# 1 **Evaluation of Genomic and Proteomic Expression of Surfactant**

## 2 **Protein D in the Mouse Retina**

3

4 **Authors:** Frederico Vieira, M.D.<sup>1</sup>, Johannes W. Kung, Ph.D.<sup>1</sup>, and \*Faizah Bhatti, M.D.,  
5 M.S.<sup>1,2</sup>.

6

### 7 **Author Affiliations:**

8 <sup>1</sup>Neonatal Perinatal Medicine, Department of Pediatrics, University of Oklahoma Health  
9 Sciences Center, Oklahoma City, OK, USA

10 <sup>2</sup>Department of Ophthalmology and Dean McGee Eye Institute, University of Oklahoma Health  
11 Sciences Center, Oklahoma City, OK, USA

12

### 13 **Author Contributions:**

14 F.V. (first author) - Conception and design, acquisition, analysis and interpretation of data,  
15 drafting and revision of the article, final approval

16 J.W.K. - Design, acquisition, analysis, and interpretation of data, drafting the article, final  
17 approval

18 F.B.- Conception and design, analysis and interpretation of data, drafting and revision of the  
19 article, final approval

20

### 21 **Corresponding author:**

22 \*Faizah Bhatti, M.D., M.S.

23 The Children's Hospital at The University of Oklahoma Health Sciences Center

24 1200 Children's Ave.

25 7<sup>th</sup> Floor North Pavilion

26 Oklahoma City, OK 73104

27 Phone: 405-271-5215

28 Fax: 405-271-1236

29 Email: [faizah-bhatti@ouhsc.edu](mailto:faizah-bhatti@ouhsc.edu)

30

## 31 **Abstract**

32 Surfactant Protein D (SP-D), an essential protein related to innate immunity, is expressed in  
33 multiple tissue types throughout the body. A closely-related protein, Surfactant Protein A (SP-  
34 A), is present in the mouse retina and is associated with neovascularization (NV) in the Oxygen-  
35 Induced Retinopathy (OIR) mouse model, mimicking retinopathy of prematurity (ROP). We  
36 hypothesized that SP-D would be present in the retina and is also associated with OIR and ROP,  
37 which is one of the leading causes of pediatric blindness due to increasing survival rates of  
38 extremely preterm newborns. In our study, we did not detect SP-D in the mouse retina through  
39 proteomic and genomic investigation at baseline and in pathways known to up-regulate SP-D in  
40 other mammal tissues. It is therefore unlikely that SP-D participates in neovascularization in the  
41 mouse retina.

42

## 43 Introduction

44 Retinopathy of prematurity (ROP) is a disease that is seen in premature newborns (1) and is  
45 related to abnormal development of the retinal vasculature and neovascularization *ex utero*.  
46 Worldwide, ROP is a leading cause of acquired childhood visual impairment and blindness.  
47 The etiology of this complex disease is still not completely understood. While exposure to high  
48 levels of oxygen and nutritional status are important in the pathology of ROP (2), inflammation  
49 has also been shown to be a key risk factor (3).

50

51 Surfactant Protein-D (SP-D), as the name implies, was first described in the surfactant  
52 substance of the lung (4). SP-D, along with Surfactant Protein A (SP-A), are recognized as  
53 collectin proteins. The collectin family of proteins shares homology in their basic monomeric  
54 structure, which is comprised of collagen-like regions attached to non-collagenous domains  
55 (5). The collagen domain and neck domain are essential in maintaining the intermediary  
56 tetramer protein structure (6). The non-collagen N-terminal domain is a cysteine-rich region  
57 critical for oligomerization occurring through disulfide bridging necessary for the mature  
58 structure of the protein (7). The last non-collagen domain is the carbohydrate recognition  
59 domain (CRD), or lectin domain. This domain is what defines the function of all collectin  
60 proteins, since they can bind to carbohydrate and lipid epitopes of different sizes and shapes  
61 from multiple microorganisms when polymerized in their tridimensional structure (8, 9). The  
62 CRD binds to multiple eukaryotic receptors necessary for innate immunity, including Toll-like  
63 receptors (TLR) 2, TLR-4, and CD14 (10, 11).

64

65 Preterm infants have developmental immaturity of their adaptive immune response (12), as

66 well as pathology related to a deficiency of surfactant and surfactant proteins. Recent  
67 investigations have found that these proteins are not exclusive to the lungs and are present in  
68 multiple organ systems throughout the body (13). We have previously reported the expression  
69 of SP-A in the mouse retina and showed that it can be expressed in cultured human Müller glial  
70 cells by ligand-receptor activation of toll-like receptors (TLR) TLR-2 and 4. We also  
71 demonstrated the up-regulation of SP-A in the murine model of oxygen-induced retinopathy  
72 (OIR). Furthermore, animals with gene targeting of SP-A had a significant reduction in  
73 neovascularization (14).

74

75 SP-A and SP-D and are both present on chromosome 10 in humans and are co-expressed in  
76 lung tissue, sharing significant homology in structure and function. Therefore, we hypothesized  
77 that SP-D is present in the mouse retina in a pattern similar to that of SP-A. Furthermore, we  
78 hypothesized that SP-D is up-regulated by exposure to oxygen stress, as well as activation of  
79 TLR-2 and TLR-4. To study this, we used a variety of protein and RNA expression assays to  
80 identify and quantify SP-D. These experiments were performed in mouse retinal tissue at  
81 baseline and after receptor activation using the toll-like receptor (TLR) ligands 2 and 4.  
82 Expression was also measured in the mouse OIR model. After we found no protein or RNA  
83 expression, we utilized mass spectrometry to confirm our results. Finally, OIR was issued in  
84 SP-D null mice (SP-D<sup>-/-</sup> or knockout [KO]) to demonstrate that the absence of SP-D does not  
85 affect the phenotype of mouse retina exposed to hyperoxia and inflammatory stress.

86

## 87 **Materials and Methods**

### 88 **ANIMALS**

89 All animal procedures adhered to the American Association for Laboratory Animal Science (AALAS)  
90 guidelines and the Association for Research in Vision and Ophthalmology (ARVO) Statement for the Use  
91 of Animals in Ophthalmic and Vision Research, and were approved by the University of Oklahoma Health  
92 Sciences Center Institutional Animal Care and Use Committee. All mice were exposed to a standard 12-  
93 hour light/dark cycle and fed standard mouse chow. C57BL/6J wild-type (WT) mice were obtained from  
94 Jackson Laboratory (Bar Harbor, ME, USA). Surfactant Protein D null mice (SP-D<sup>-/-</sup>) were a kind gift from  
95 the Korfhagen Lab in the Division of Pulmonary Biology from Children's Hospital Research Foundation  
96 (Cincinnati, OH, USA). The generation and background of these mice have been reported previously in  
97 detail (15). PCR was used to determine the genotype of all pups prior to analysis (16). After confirmation  
98 of genotype, wild-type mice were euthanized, and their retinas were collected at postnatal day 0 (P0),  
99 P2, P5, P7, and P14, and in adulthood (ages varied from P48 to 6 months of age). Mice at P0 and P2  
100 were deeply anesthetized via cryoanesthesia and decapitated. Mice at P5 and older were euthanized by  
101 CO<sub>2</sub> asphyxiation. Tissue was then harvested for each experiment as described below.

102

### 103 **GENOTYPING**

104 PCR confirmed the genotypes of animals used in experiments. DNA samples were obtained by a tail  
105 fragment or ear punch digestion with 50 mL 50 mM NaOH digest buffer for 1 h at 95 °C. The pH was  
106 adjusted to 7.0 by titration with 7 µL buffer containing 100 µM Tris (HCl) and 10 µM EDTA. DNA was  
107 added to Quick-Load *Taq* 2x Master Mix (New England Biolabs, Ipswich, MA, USA) and respective  
108 primers.

109 For SP-D detection in WT animals, the forward primer was generated in the first intron and the  
110 complimentary reverse primer was developed for the second exon, which includes the codon for  
111 translation start with the sequence. The primers for the detection of the knockout gene (KO) were  
112 developed based on the mouse created by Korfhagen *et al.* by the integration of a vector neo nucleotide

113 sequence. The neo sequence deletes the initiating methionine and translation initiation sequence ATG  
114 from the second exon (15, 16). For the rd1 mutation on the Pde6b gene, primers were used according to  
115 the methods of Blazek et al. (17). All primers were purchased from Eurofins Genomics (Louisville, KY,  
116 USA). Sequences are described in Table 1.  
117

**Table 1. List of primer sequences**

| Primer            | Sequence (5'-3')         | Size of PCR-product |
|-------------------|--------------------------|---------------------|
| SP-D WT forward   | GGCCAGACCATGTACCTACC     | 202 bp              |
| SP-D WT reverse   | GAGAGAAAGGGCAGCATGTC     |                     |
| SP-D KO forward   | TGCAGACTCAGCCTCAAATG     | 594 bp              |
| SP-D KO reverse   | GGGGAACCTCCTGACTAGGG     |                     |
| Rd1 forward       | CATCCCACCTGAGCTCACAGAAAG | Rd1 -/- 137 bp      |
| Rd1 reverse       | GCCTACAACAGAGGAGTTCTAGC  | Rd1 +/+ 298 bp      |
| mRNA SP-D forward | GAAGCAATCTGACATGCTGC     | 430 bp              |
| mRNA SP-D reverse | GCACCTACTTCTCCTTTGGG     |                     |

Primer sequences designed and generated for this study.

118

119

## 120 LOCALIZATION AND EXPRESSION OF SP-D IN MOUSE RETINA

121 Our first objective was to determine whether SP-D mRNA and protein were expressed by retinal tissue  
122 during various developmental time points in the WT mouse. Measurements in SP-D <sup>-/-</sup> mice were used  
123 as a control. Localization and expression were evaluated by PCR for mRNA, by immunohistochemistry  
124 (IHC) for protein localization, and by western blotting and ELISA for protein measurements.

125

126 **Detection of SP-D-encoding mRNA:** RNA was extracted from mouse whole lung and whole retina using  
127 PureZOL RNA reagent from BIO-RAD Laboratories (Hercules, CA, USA) with the method described by  
128 Chomczynski *et al.* (18). RNA samples were tested for purity by Nanodrop 2000 from Thermo Scientific  
129 (Lenexa, KS, USA). cDNA was synthesized from mRNA using the qScript cDNA synthesis kit from  
130 Quanta Biosciences (Beverly, MA, USA) and used for PCR at 61 °C with OneTaq Quick-Load 2x Master

131 Mix from New England Biolabs (Ipswich, MA, USA) and primers specifically binding to cDNA derived from  
132 mature mRNA, but not to genomic DNA. The forward primer targets the end of exon 1, skips intron 1,  
133 and ends in exon 2, which includes the ATG sequence for the start codon for protein translation (Figure  
134 1). The reverse complementary primer starts at the end of exon 2, skips intron 2, and ends in exon 3,  
135 generating a 430-bp fragment (Table 1).

136

137 ***Immunohistochemistry (IHC)***: Eucleated whole eyes were placed in fixative (PreFer; Anatech, Ltd.,  
138 Battlecreek, MI, USA) for 30 minutes at room temperature (RT). Lung tissue was kept in the fixative  
139 solution until complete fixation was indicated by precipitation to the bottom of the container. Tissues were  
140 then treated with 70 % ethanol, embedded in paraffin, and sections were prepared on glass slides.  
141 Tissue sections were deparaffinized and blocked in 10% horse serum in PBS-0.1% Triton for 2 h.  
142 Sections were then incubated in the following primary antibodies overnight at 4 °C: rabbit polyclonal anti-  
143 SP-D (1:100 dilution; Antibodies-online Inc., St. Atlanta, GA, USA); rat anti-CD31 for endothelial cells  
144 (1:200 dilution; Dianova GmbH, Hamburg, Germany). Sections were incubated with Alexa Fluor 488- and  
145 594-conjugated secondary antibodies (Invitrogen, Grand Island, NY, USA) at RT for 2 h. Sections were  
146 examined by confocal microscopy (SP2 model confocal microscope; Leica Microsystems GmbH, Buffalo  
147 Grove, IL, USA). All images shown are maximum projections from z-stacks through the entire tissue  
148 section. Primary antibody omission controls were performed for all antibodies (data not shown).

149

150 ***Western Blot for SP-D Protein Detection in the Mouse Retina***: Dissected whole retina and lung tissue  
151 (positive controls) homogenates were prepared by the addition of 100 to 150 µL of lysis buffer (Invitrogen,  
152 Grand Island, NY, USA) with protease inhibitor cocktail (Millipore, Billerica, MA, USA), respectively.  
153 Tissue samples were sonicated and centrifuged, and the supernatant was collected. Total protein  
154 concentration was assessed by bicinchoninic acid (BCA) assay using a Pierce BCA Protein Assay Kit  
155 accordingly to the manufacturer's instructions (Thermo Scientific; Lenexa, KS, USA). Equal volumes of  
156 30 µg total protein were denatured by adding Sample Loading Buffers (BIO-RAD Laboratories; Hercules,



157 CA, USA). Denatured protein samples were loaded onto 4-20% Tris-Glycine Gel Novex WedgeWell  
158 (Invitrogen; Grand Island, NY, USA) for gel electrophoresis. Protein from the gel was then transferred to  
159 a BioTrace Nitrocellulose transfer membrane with 0.2- $\mu$ m pores (PALL laboratory; Port Washington, NY,  
160 USA). The membrane was blocked with 5% skim milk powder in tris-buffered saline (TBST). Membranes  
161 were incubated with primary antibodies at 4 °C overnight. The following primary antibodies were used:  
162 goat anti-SP-D from Santa Cruz (1:250 dilution; Dallas, TX, USA) and R&D systems (1:250 dilution;  
163 Minneapolis, MN, USA), and rabbit anti-SP-D from Antibodies-online, Inc. (1:250 dilution; Atlanta, GA,  
164 USA). Secondary antibodies, donkey anti-goat horseradish peroxidase (HRP) from Abcam (1:500  
165 dilution; Cambridge, MA, USA) and donkey anti-rabbit from Invitrogen (1:500 dilution; Grand Island, NY,  
166 USA), were incubated at RT for 2 h and covered with foil. Membrane images were obtained using  
167 SuperSignal West Dura Extended Duration Substrate (Thermo Scientific; Lenexa, KS, USA) and Kodak  
168 Image Station 2000MM (Rochester, NY, USA).

169

170 ***Enzyme-Linked Immunosorbent Assay (ELISA) for SP-D Protein Quantification:*** Retina and lung  
171 homogenates were prepared as described above for western blotting. The Mouse SP-D Immunoassay  
172 Quantikine ELISA kit from R&D system (Minneapolis, MN, USA) was used according to the  
173 manufacturer's directions. Briefly, the microwells of a 96-well plate were coated with diluted, purified anti-  
174 mouse SP-D monoclonal antibody. The wells were washed, and nonspecific sites were blocked. Diluted,  
175 purified mouse SP-D standards (0.625–40 ng/mL) and retinal lysates were added to the antibody-coated  
176 wells, and the plate was incubated for 2 h at RT. The plate was washed and incubated with a horseradish  
177 peroxidase-conjugated anti-mouse polyclonal SP-D antibody. Color reagents tetramethylbenzidine  
178 substrate solution and stabilized hydrogen peroxidase were added. The reaction was stopped by adding  
179 hydrochloric acid. The color change was measured by reading it at 450 nm, with the correction  
180 wavelength set at 540 nm or 570 nm using a FLUOstar Omega multi-mode microplate reader (BMG  
181 LABTECH, Cary, NC, USA).

182

183 **UP-REGULATION OF SP-D EXPRESSION IN THE MOUSE RETINA**

184 After mouse retinas were examined at baseline, we sought to determine whether the expression of SP-  
185 D mRNA and protein could be elicited by inflammatory stress after intravitreal injections with the toll-like  
186 receptor ligands (TLR), TLR-2 and TLR-4, or after exposure to hyperoxia.

187

188 ***Intravitreal Injection of TLR-2 and TLR-4 Ligands:*** Six-week-old WT mice were anesthetized by  
189 intraperitoneal injection of ketamine/xylazine (100:10 mg/kg). Animals received 1 µg of the TLR-2 ligand  
190 Pam3Cys-Ser-(Lys)<sub>4</sub> trihydrochloride (Pam3Cys) (Invivogen, San Diego, CA, USA), 1 µg of the TLR-4  
191 ligand LPS (Sigma-Aldrich Corp., St. Louis, MO, USA), or control phosphate-buffered saline (PBS) in a  
192 total volume of 1 µL PBS vehicle. Injections were performed intravitreally using a 36-gauge needle  
193 mounted on a 10-µL syringe (Hamilton Co., Reno, NV, USA). The tip of the needle was inserted under  
194 the guidance of a dissecting microscope (Wild M650 model; Leica, Bannockburn, IL, USA) through the  
195 dorsal limbus of the right eye. The animals were euthanized at 6, 12, 24, and 48 hours after the injections.  
196 Whole-retina homogenates were used for RNA extractions and mRNA PCR, as described above.

197

198 ***Expression of SP-D in OIR:*** OIR was induced in WT and SP-D<sup>-/-</sup> mice by using a previously published  
199 technique (19). Briefly, all newborn mouse pups were maintained in room air (RA) with their dams until  
200 P7. At P7, pups (n=6) and the dams were placed in a poly(methyl methacrylate) (Plexiglas) chamber and  
201 exposed to 75% oxygen, using the Oxycycler C42 system (Biospherix, Lacuna, NY, USA). The second  
202 set of pups (n=6) were kept in room air to serve as controls. The dams were replaced every 48 hours  
203 with healthy dams, as adult mice do not tolerate prolonged hyperoxia. At P12, the pups and dams in the  
204 oxygen chamber were returned to room air and maintained there until P17. Whole retinas from WT  
205 animals were studied at three time-points for expression of SP-D mRNA: a) at P7 before oxygen exposure  
206 (baseline), b) at P12 after hyperoxia (vaso-obliterative [VO] phase), and c) P17 at the time of completion  
207 of OIR (neovascular [NV] phase).

208

209 **Retinal Flat-mounts and Imaging:** To examine the effect of the absence of SP-D on retinal vascular  
210 phenotype at baseline, after inflammation, and in OIR, mouse pups were euthanized, and their retinas  
211 were harvested and incubated with anti-CD31 antibody, followed by flat-mounting. Total retinal area, area  
212 of VO, and area of NV were analyzed using a well-established and standardized method (20). Briefly,  
213 Adobe Photoshop was used, and the area of vascular growth was outlined and quantified to measure the  
214 total retinal area, the area of VO, and the area of NV. NV was expressed as a percentage of the total  
215 retinal area. Six animals were included in each group, which had been determined by power analysis to  
216 be able to detect a 30% difference in NV with a b error of 0.2 and an area of 0.05. The mean areas of NV  
217 on the flat-mounts were compared with Student's *t*-test. A P-value of < 0.05 was considered significant.

218

#### 219 **MASS SPECTROMETRY (MS) FOR THE IDENTIFICATION OF SP-D PROTEIN**

220 For final confirmation of SP-D expression, MS was performed on retinas from WT C57BL/6J mouse pups.  
221 WT and SP-D<sup>-/-</sup> retina and control lung samples were prepared based on the standard targeted  
222 proteomics approach. Sixty µg of total protein each sample was taken and 8 pmol BSA added as an  
223 internal standard. The proteins were precipitated with acetone. The dried protein pellet was reconstituted  
224 in Laemmli sample buffer, and 20 µL (20 µg total protein) was run into a short (1.5cm) SDS-PAGE gel.  
225 The gel was fixed and stained. Each sample was cut from the gel as the entire lane and divided into  
226 smaller pieces. The gel pieces were washed to remove the Coomassie blue, then reduced, alkylated,  
227 and digested overnight with trypsin. The mixture of peptides was extracted from the gel, evaporated to  
228 dryness in a SpeedVac, and reconstituted in 150 µL 1% acetic acid for analysis.

229

230 Protein analyses were carried out on a QEx quadrupole-orbitrap mass spectrometry system. The HPLC  
231 was an Ultimate 3000 nanoflow system with a 10cm x 75µm i.d. C18 reversed-phase capillary column.  
232 Five-µL aliquots were injected, and the peptide eluted with a 60-min gradient of acetonitrile in 0.1% formic  
233 acid. The mass spectrometer was operated in the parallel reaction monitoring mode (PRM). The method  
234 was developed to initially target a total of seven peptides based on a combination of the protein sequence

235 and information in the PeptideAtlas database. Data were analyzed using the program SkyLine to find and  
236 integrate the appropriate chromatographic peaks. These analyses showed that four of the possible  
237 peptides were detectable (Table 2).

238

**Table 2. Peptides analyzed by Mass Spectrometry.**

| Sftpd peptides    | Domain location | SP-D specificity | Tissue of expression    |
|-------------------|-----------------|------------------|-------------------------|
| AALFPDGR          | Neck domain     | Specific         | Only WT lung            |
| GENGSAGEPGPK      | Collagen domain | Not specific     | WT & KO - lung & retina |
| GESGLPDSAALR      | Collagen domain | Not specific     | WT & KO lung & retina   |
| LEVAFSHYQK        | Neck domain     | Specific         | Only WT -lung           |
| GEVGAPGMQGSTGAK   | Collagen domain | Not specific     | WT & KO lung & retina   |
| AAFLSMTDVGTEGK    | CRD domain      | Exclusively SP-D | Only WT lung            |
| SATENAAIQQLITAHNK | CRD domain      | Exclusively SP-D | Only WT lung            |

The peptides highlighted in gray are specific for SP-D and were only found in the WT lung. The non-specific peptides were identified in lung and retina in the WT and KO mice. Please refer to supplemental material for more details.

239

240

## 241 **Results**

### 242 **Is SP-D gene expression detected in the mouse retina?**

243 Utilizing RT-PCR, SP-D mRNA was detected with positive bands at 430 bp in the WT lung tissue, which  
244 were absent from the SP-D<sup>-/-</sup> lung. In the WT retina from healthy animals, the expected band at 430 bp  
245 was not detected (Figure 6). Similarly, in the postnatal developmental retina sample, SP-D mRNA was  
246 not present in the retina (Figure 7b).

247

248 The absence of gene expression at baseline in WT mice prompted us to evaluate whether expression  
249 could be induced in a stressful pathological state. First, we tested retinal tissue from WT pups exposed  
250 to the OIR model at both P12 (VO) and P17 (NV) (Figure 8). Exposure to oxygen did not induce the  
251 expression of SP-D mRNA. We also tested retinas exposed to Pam3cys (TLR-2 ligand) and LPS (TLR-  
252 4 ligand) by intravitreal injection (Figure 7c). These insults did not induce the expression of SP-D mRNA.

253

### 254 **Expression of SP-D Protein in the Mouse Retina**

255 Initially, our primary antibody was tested in WT C57BL/6J adult mouse lung tissue. Expression of SP-D,  
256 according to IHC results, is characterized by a speckled appearance in the cells lining the alveolar spaces  
257 in the color green due to secondary antibody Alexa-Fluor 488 (Figure 2a). SP-D expression was seen in  
258 retinal cross-sections in adult mouse retinas. We then proceeded with an analysis of cross-sections of  
259 the retina at early developmental time points (Figure 2a and 2h). However, our antibody strategy gave  
260 expected results only at P0 (Figure 2b). At older ages from P2 to P14, the detection of SP-D was  
261 decreased (Figure 2c - f).

262

263 Similarly, the western blot of the homogenized retina from WT C57BL/6J mouse did not show consistent  
264 bands for SP-D protein. The R&D systems antibody gave a 45 kDa band for WT lung tissue, as expected.  
265 However, the WT retina tissue did not generate any specific band. For SP-D<sup>-/-</sup> animals, the lung tissue  
266 was negative, and the retina tissue gave a band of 69 kDa. The primary antibody (Antibodies-online, Inc.)

267 gave multiple positive bands in the WT lung tissue and SP-D<sup>-/-</sup> lung and retina. The WT retina did not  
268 produce any strong bands (Figure 3). This led us to conclude that readily available SP-D antibodies are  
269 not reliable in the detection of protein in tissues other than the lung.

270

271 For further confirmation, SP-D ELISA was performed. It was also negative for SP-D in the adult WT retina.  
272 The adult WT lung sample had approximately 3 ng/mg of total protein. However, the WT adult retina had  
273 an undetectable amount of SP-D.

274

275 Since methods to detect SP-D with commercially available antibodies were not successful, we then  
276 proceeded to protein mass spectrometry. We sent retina and lung tissues from WT and SP-D<sup>-/-</sup> mice for  
277 peptide analysis. SP-D peptides identified in the WT lung and not in the SP-D<sup>-/-</sup> lung are reported in  
278 Table 2. These peptides belong to the CRD domain and the neck domain, which are the collagen domains  
279 with no similarities to other collectin proteins (Figures 4 and 5). The peptides that were not present in the  
280 SP-D<sup>-/-</sup> lung and retina tissue were also not present in the WT retina tissue, demonstrating that it is  
281 unlikely that SP-D was present in the retina.

282

### 283 **Does SP-D Impact the Vascular Phenotype in the Mouse Oxygen-Induced Retinopathy Model?**

284 WT and SP-D<sup>-/-</sup> mice were exposed to hyperoxia to induce VO and NV in the OIR model. WT mice had  
285 an NV ratio of 21%, while SP-D<sup>-/-</sup> mice had 16%. While there was a modest decrease in NV of 5% in  
286 SP-D<sup>-/-</sup> mouse retinas, this difference was not statistically significant (p-value 0.3531). Vaso-oblivation  
287 ration was 6% in both WT and SP-D<sup>-/-</sup> mouse retinas (p-value of 0.9957). WT mouse retinas and SP-D  
288<sup>-/-</sup> in RA that were not exposed to OIR had no NV, as expected (Figure 9).

289

### 290 **Discussion**

291 SP-D is an important c-type lectin that was initially thought to be primarily associated with pulmonary  
292 tissue, but has been reported to be present in a variety of organ systems in mice and humans (13). This

293 study is the first to investigate the presence of SP-D in the mouse retina. We have demonstrated that  
294 SP-D is not present in the C57BL/6J mouse retina at baseline, nor up-regulated by inflammatory or  
295 oxidative stress. The results were confirmed by gene expression and proteomic analysis.

296

297 Retinal vascular disease (ROP) is a significant long-term complication for preterm low birth weight  
298 infants, and the leading cause of acquired childhood blindness in the U.S. (21, 22). The pathophysiology  
299 of ROP is multifactorial, but inflammation is one of the major contributors to the disease (23-25).  
300 Vascular endothelial growth factor (VEGF) is an essential factor in the abnormal neovascularization  
301 seen in ROP (26). Several studies have shown that Toll-Like Receptors 2 and 4 up-regulate VEGF in  
302 lung tissue after exposure to hyperoxia (27). Also, VEGF will up-regulate SP-D production in type II  
303 pneumocytes in the lung (28). Furthermore, there is a direct correlation of TLR-4, causing retinal  
304 ischemia/reperfusion injury (29). We therefore speculated that a variety of stressors and inflammatory  
305 signaling pathways may lead to the expression of SP-D in the retina, and that SP-D could participate in  
306 the abnormal vascularization seen in ROP. Since SP-D has been identified in multiple tissues other  
307 than the lung, including brain tissue (13), the presence of SP-D in retina seemed plausible. Furthermore,  
308 SP-A, an analogous c-type lectin protein, is present in the retina, is up-regulated by TLR-2 and 4 ligands  
309 and in the OIR mouse model, and affects both physiological (unpublished data) and pathological retinal  
310 vascularization (14).

311

### 312 **SP-D, Inflammation, and the Prematurely Born Infant**

313 Surfactant Protein D belongs to a superfamily of c-type lectins with multiple immunological functions.  
314 One of the defining characteristics of SP-D is the CRD affinity for inositol, maltose, and glucose, and a  
315 poor affinity for sugar moieties of galactose and sialic acid in invertebrate animals (30). These  
316 differences in carbohydrate affinity are important in identification of pathogens in the airway and other  
317 tissues, but not self-sugar moieties. It also plays a crucial role in the ability of SP-D to opsonize bacteria  
318 and viruses (31-33) and direct the killing of pathogens (34). SP-D has been shown to bind to multiple

319 receptors and acceptors, which may result in either pro- or anti-inflammatory activity. Scavenger  
320 receptor cysteine-rich (SRCR) (35), defensins (36-38), calreticulin (39), TLR-2 and 4 (10), LPS (TLR-4  
321 ligand) (40), and CD14 (co-receptor of TLR-4) (41) are among the acceptors and receptors important  
322 in the innate immunity with which SP-D interacts. Even though SP-D participates in adaptive immunity  
323 (42), the main function of SP-D correlates with innate immunity. Taken together, these characteristics  
324 define the importance of the SP-D in the medical specialty of neonatology, in which subjects will have  
325 an inflammatory response-related function of the innate immune system.

326

### 327 **SP-D Expression in the Mouse Retina**

328 The C57BL/6J mouse was chosen as the subject for our investigations as its retinal vascular  
329 development is similar to that of a preterm newborn delivered at approximately 24 weeks' gestational  
330 age (43). Initial pilot and feasibility experiments involved the examination of developmental  
331 immunohistochemistry, since cross-sectional retinal tissue can be easily obtained at postnatal ages P0,  
332 P2, P5, P7, P14, and P42-P48 (adult). In addition, the necessary primary antibodies for IHC were readily  
333 commercially available. Lung tissue of WT animals was used as a positive control for our antibodies.  
334 The tested antibodies localized to the airway lining of pulmonary alveoli, an area with very high  
335 expression of SP-D. When retinal tissue was tested, IHC showed strong staining by the antibody, with  
336 localization in the optic nerve, optic disk, and choroid tissue, areas known to have greater  
337 vascularization in neonatal mice, at P0. At ages P5, P7, and P14, there was a significant decrease in  
338 antibody binding in the retina tissue and optic nerve. However, when appropriate negative controls  
339 (tissue from SP-D <sup>-/-</sup> mice) were evaluated, there were inconsistent results in retinal tissue. Further  
340 evaluation with ELISA and western blot analysis was therefore performed. ELISA for SP-D showed a  
341 high concentration of SP-D protein in WT lung control. However, we were never able to measure SP-D  
342 in the retina tissue of WT adult mice. In our western blot, we had a similar issue with our commercially  
343 acquired antibodies. We detected SP-D in WT lung tissue, but it did not give a band of 45 kDa in WT  
344 retina tissue. For this reason, testing with a variety of different commercially available antibodies was



345 performed. However, these antibodies either showed no expression in retina protein extract, or they  
346 produced multiple bands at different molecular weights. We speculate that since the commercially  
347 available antibodies are generated for pulmonary SP-D, retinal protein may have a different post-  
348 translational modification or haplotype due to gene polymorphism (44, 45). The primary antibodies with  
349 positive results were polyclonally derived, making it impossible to determine which of the clones would  
350 be expected to bind to the CRD domain of the monomeric structure of the protein after denaturation. As  
351 described earlier, the CRD domain has an amino acid sequence distinct from that of other collectin  
352 proteins and has minimal variants among haplotypes.

353

354 Due to the uncertainty of the affinity from commercially available antibodies to detect expected retinal  
355 SP-D, WT retinal tissue was sent for proteomic mass spectrometry (MS). Mass spectrometry has the  
356 advantage of analyzing peptide sequences according to molecular weight and charge without a need  
357 to use any other biological support to identify proteins or peptides (46). However, the peptide libraries  
358 for WT mouse retina, PeptideAtlas database, had no reported information for SP-D. For appropriate  
359 comparison, adult WT lung and SP-D<sup>-/-</sup> lung was sent to compare major peptides that would be present  
360 in the WT tissue, but not in the gene-deleted tissue. In this manner, peptides from proteins other than  
361 SP-D would not interfere in the search for SP-D in the WT retina. The peptides absent from the SP-D<sup>-/-</sup>  
362 lung were also absent from the WT retina. Of these four peptides, two were from the CRD domain and  
363 two were from the neck region, which are the regions with the lowest variation among haplotypes and  
364 minimal similarities to other collectin proteins.

365

366 Bhatti *et al.* have previously reported expression of SP-A mRNA and protein in whole murine retinal  
367 tissue, as well as in cultured human MIO-M1 and Müller cells (14). We, therefore, hypothesized that  
368 Müller cells would similarly express SP-D in the mouse retina. Previous proteomic analysis by MS of  
369 murine retinas of Müller cell-enriched and -depleted samples did not identify SP-A or SP-D (47).  
370 However, the analysis was guided by the concentration of peptides, so we could argue that SP-D was

371 not demonstrated in MS of the WT retina due to low concentration in retinal Müller cells.

372 In summary, our proteomic investigation of the possible presence of SP-D in the mouse retina showed  
373 that commercially available antibodies to pulmonary SP-D did not detect SP-D in the retina. Mass  
374 spectrometry did not detect important peptides that define SP-D in the mouse retina.

375

### 376 **Genomic Verification of SP-D in Mouse Retina**

377 To supplement our proteomic results that SP-D is absent from the WT mouse retina, we evaluated the  
378 presence of intermediary pathway product SP-D mRNA, with WT lung used as a positive control. The  
379 results of the preliminary gel agreed with our proteomic results. PCR analysis showed that the WT lung  
380 was positive and the WT retina and SP-D <sup>-/-</sup> lungs were negative for SP-D mRNA. No SP-D mRNA was  
381 detected at the ages of P0, P2, P5, P7, P14, and P42-48.

382

383 Considering that SP-D is an immunoregulatory protein, it was possible that SP-D would be only  
384 minimally expressed at baseline and up-regulated in the retina once exposed to noxious stimuli as TLR-  
385 2 and TLR-4 ligands, which are known to up-regulate SP-D expression in lung tissue. As inflammation  
386 is a significant contributor to ROP and SP-A is up-regulated after intravitreal injection of Pam3Cys (TLR-  
387 2 ligand) and LPS (TLR-4 ligand), we decided to perform similar experiments in the WT mouse retina.  
388 However, no mRNA SP-D was detected in the retinas exposed to TLR 2 and 4 ligands.

389

390 Since our ultimate goal was to investigate possible effects of SP-D in ROP, we finally proceeded to  
391 study the impact of hyperoxia/hypoxia as a potential promoter of SP-D transcription in the WT retina.  
392 WT pups were exposed to the OIR model, which mimics the environment and pathological process  
393 endured by premature infants (19, 48). Retinas were harvested after five days of exposure to 75%  
394 hyperoxia at P12, at which point the retinal vasculature undergoes vaso-obliteration, as it does after  
395 relative hypoxia at P17, which would induce neovascularization similar to ROP. As discussed earlier,  
396 VEGF is the main signaling pathway for abnormal vessel development in this situation. Since VEGF up-

397 regulates SP-D in lung tissues, hypoxia and hyperoxia could be additional noxious stimuli to potentially  
398 cause transcription of SP-D in the mouse retina. Once again, no SP-D mRNA was detected in any of  
399 the retinas at P12 and P17. In summary, SP-D is not transcribed in the WT mice, even after application  
400 of noxious stimuli known to cause up-regulation of this protein in other tissues.

401

#### 402 **Retina phenotype of SP-D<sup>-/-</sup> mouse**

403 At baseline and after noxious stimuli, we did not demonstrate the presence of SP-D in the retina at the  
404 molecular level. However, not all interactions of SP-D were postulated in this manuscript; this protein  
405 can have many relationships with different receptors and pathogens (13). In order to determine whether  
406 another possible pathway or receptor was impacted by the systemic absence of SP-D in the global  
407 knockout, retinal vascular phenotypes were compared between WT and SP-D mouse retinas after OIR.  
408 While there was a small decrease (5%) in retinal vascular disease, this difference was not significant.  
409 Therefore, while there may be a small contribution, the lack of systemic SP-D did not demonstrate a  
410 significant impact on the final phenotype in OIR.

411

412 **CONCLUSIONS**

413 SP-D is not present in the WT C57BL/6J mouse retina. Proteomic analysis did not detect or measure  
414 SP-D from retina protein homogenate. The positive fluorescence in the preliminary IHC shows that the  
415 pulmonary SP-D antibody may be detecting other collectins in the retina tissue. Furthermore, the  
416 genomic investigation of SP-D mRNA demonstrated that SP-D is not being transcribed or generated by  
417 pathways known to up-regulate SP-D in lung tissue. Similarly, the absence of SP-D in the retina did not  
418 change the phenotype of vessel development in this tissue. From these findings, it is unlikely that SP-  
419 D participates in retinopathy of mouse retinas. While SP-A and SP-D are commonly co-expressed in a  
420 variety of tissues with a similar pro/anti-inflammatory signature, the mouse retina did not show such an  
421 association.

422

423

424 **ACKNOWLEDGEMENTS:**

425 The authors thank the Histology Core Facility and Imaging Core Facility; Mark Dittmar, Manager,  
426 Animal Facilities at the Dean McGee Eye Institute; and Mike Kinter at the Laboratory for Molecular  
427 Biology and Cytometry Research at the University of Oklahoma Health Sciences Center in Oklahoma  
428 City for assistance with mass spectrometry and proteomics services.

429

430 Supported by a U.S. National Institutes of Health P20 RR017703-10 Pilot Project Award and the  
431 5P30EY021725 P30-Center Core Grant For Vision Research

432

433 **REFERENCES:**

- 434 1. Patz A, Hoeck LE, De La Cruz E. Studies on the effect of high oxygen administration in retrolental  
435 fibroplasia. I. Nursery observations. *American journal of ophthalmology*. 1952;35(9):1248-53.
- 436 2. Hay WW, Jr., Bell EF. Oxygen therapy, oxygen toxicity, and the STOP-ROP trial. *Pediatrics*.  
437 2000;105(2):424-5.
- 438 3. Klinger G, Levy I, Sirota L, Boyko V, Lerner-Geva L, Reichman B, et al. Outcome of early-onset  
439 sepsis in a national cohort of very low birth weight infants. *Pediatrics*. 2010;125(4):e736-40.
- 440 4. Persson A, Rust K, Chang D, Moxley M, Longmore W, Crouch E. CP4: a pneumocyte-derived  
441 collagenous surfactant-associated protein. Evidence for heterogeneity of collagenous surfactant  
442 proteins. *Biochemistry*. 1988;27(23):8576-84.
- 443 5. Haagsman HP, White RT, Schilling J, Lau K, Benson BJ, Golden J, et al. Studies of the structure of  
444 lung surfactant protein SP-A. *The American journal of physiology*. 1989;257(6 Pt 1):L421-9.
- 445 6. Hoppe HJ, Reid KB. Collectins--soluble proteins containing collagenous regions and lectin  
446 domains--and their roles in innate immunity. *Protein science : a publication of the Protein Society*.  
447 1994;3(8):1143-58.
- 448 7. Hawgood S, Efrati H, Schilling J, Benson BJ. Chemical characterization of lung surfactant  
449 apoproteins: amino acid composition, N-terminal sequence and enzymic digestion. *Biochemical Society*  
450 *transactions*. 1985;13(6):1092-6.
- 451 8. Rust K, Grosso L, Zhang V, Chang D, Persson A, Longmore W, et al. Human surfactant protein D:  
452 SP-D contains a C-type lectin carbohydrate recognition domain. *Archives of biochemistry and biophysics*.  
453 1991;290(1):116-26.
- 454 9. Lim BL, Wang JY, Holmskov U, Hoppe HJ, Reid KB. Expression of the carbohydrate recognition  
455 domain of lung surfactant protein D and demonstration of its binding to lipopolysaccharides of gram-  
456 negative bacteria. *Biochemical and biophysical research communications*. 1994;202(3):1674-80.
- 457 10. Ohya M, Nishitani C, Sano H, Yamada C, Mitsuzawa H, Shimizu T, et al. Human pulmonary  
458 surfactant protein D binds the extracellular domains of Toll-like receptors 2 and 4 through the  
459 carbohydrate recognition domain by a mechanism different from its binding to phosphatidylinositol and  
460 lipopolysaccharide. *Biochemistry*. 2006;45(28):8657-64.
- 461 11. Sano H, Chiba H, Iwaki D, Sohma H, Voelker DR, Kuroki Y. Surfactant proteins A and D bind CD14  
462 by different mechanisms. *The Journal of biological chemistry*. 2000;275(29):22442-51.
- 463 12. Fadel S, Sarzotti M. Cellular immune responses in neonates. *Int Rev Immunol*. 2000;19(2-3):173-  
464 93.
- 465 13. Vieira F, Kung JW, Bhatti F. Structure, genetics and function of the pulmonary associated  
466 surfactant proteins A and D: The extra-pulmonary role of these C type lectins. *Ann Anat*. 2017;211:184-  
467 201.
- 468 14. Bhatti F, Ball G, Hobbs R, Linens A, Munzar S, Akram R, et al. Pulmonary surfactant protein a is  
469 expressed in mouse retina by Muller cells and impacts neovascularization in oxygen-induced  
470 retinopathy. *Investigative ophthalmology & visual science*. 2015;56(1):232-42.
- 471 15. Korfhagen TR, Sheftelyevich V, Burhans MS, Bruno MD, Ross GF, Wert SE, et al. Surfactant  
472 protein-D regulates surfactant phospholipid homeostasis in vivo. *J Biol Chem*. 1998;273(43):28438-43.
- 473 16. Bhatti F, Kung JW, Vieira F. Retinal degeneration mutation in Sftpa1tm1Kor/J and Sftpd -/  
474 targeted mice. *PLoS One*. 2018;13(7):e0199824.

- 475 17. Blazek JD, Billingsley CN, Newbauer A, Roper RJ. Embryonic and not maternal trisomy causes  
476 developmental attenuation in the Ts65Dn mouse model for Down syndrome. *Developmental dynamics*  
477 : an official publication of the American Association of Anatomists. 2010;239(6):1645-53.
- 478 18. Chomczynski P, Sacchi N. Single-step method of RNA isolation by acid guanidinium thiocyanate-  
479 phenol-chloroform extraction. *Analytical biochemistry*. 1987;162(1):156-9.
- 480 19. Smith LE, Wesolowski E, McLellan A, Kostyk SK, D'Amato R, Sullivan R, et al. Oxygen-induced  
481 retinopathy in the mouse. *Investigative ophthalmology & visual science*. 1994;35(1):101-11.
- 482 20. Connor KM, Krah NM, Dennison RJ, Aderman CM, Chen J, Guerin KI, et al. Quantification of  
483 oxygen-induced retinopathy in the mouse: a model of vessel loss, vessel regrowth and pathological  
484 angiogenesis. *Nat Protoc*. 2009;4(11):1565-73.
- 485 21. Kemper AR, Wade KC, Hornik CP, Ying GS, Baumritter A, Quinn GE. Retinopathy of prematurity  
486 risk prediction for infants with birth weight less than 1251 grams. *J Pediatr*. 2015;166(2):257-61.e2.
- 487 22. Hartnett ME. Pathophysiology and mechanisms of severe retinopathy of prematurity.  
488 *Ophthalmology*. 2015;122(1):200-10.
- 489 23. Lee J, Dammann O. Perinatal infection, inflammation, and retinopathy of prematurity. *Seminars*  
490 *in fetal & neonatal medicine*. 2012;17(1):26-9.
- 491 24. Dammann O, Brinkhaus MJ, Bartels DB, Dordelmann M, Dressler F, Kerk J, et al. Immaturity,  
492 perinatal inflammation, and retinopathy of prematurity: a multi-hit hypothesis. *Early Hum Dev*.  
493 2009;85(5):325-9.
- 494 25. Woo SJ, Park KH, Jung HJ, Kim S, Choe G, Ahn J, et al. Effects of maternal and placental  
495 inflammation on retinopathy of prematurity. *Graefes' archive for clinical and experimental*  
496 *ophthalmology = Albrecht von Graefes Archiv fur klinische und experimentelle Ophthalmologie*.  
497 2012;250(6):915-23.
- 498 26. Alon T, Hemo I, Itin A, Pe'er J, Stone J, Keshet E. Vascular endothelial growth factor acts as a  
499 survival factor for newly formed retinal vessels and has implications for retinopathy of prematurity. *Nat*  
500 *Med*. 1995;1(10):1024-8.
- 501 27. Ramanathan M, Pinhal-Enfield G, Hao I, Leibovich SJ. Synergistic up-regulation of vascular  
502 endothelial growth factor (VEGF) expression in macrophages by adenosine A2A receptor agonists and  
503 endotoxin involves transcriptional regulation via the hypoxia response element in the VEGF promoter.  
504 *Molecular biology of the cell*. 2007;18(1):14-23.
- 505 28. Grubor B, Meyerholz DK, Lazic T, DeMacedo MM, Derscheid RJ, Hostetter JM, et al. Regulation of  
506 surfactant protein and defensin mRNA expression in cultured ovine type II pneumocytes by all-trans  
507 retinoic acid and VEGF. *International journal of experimental pathology*. 2006;87(5):393-403.
- 508 29. Dvorianchikova G, Barakat DJ, Hernandez E, Shestopalov VI, Ivanov D. Toll-like receptor 4  
509 contributes to retinal ischemia/reperfusion injury. *Mol Vis*. 2010;16:1907-12.
- 510 30. Persson A, Chang D, Crouch E. Surfactant protein D is a divalent cation-dependent carbohydrate-  
511 binding protein. *The Journal of biological chemistry*. 1990;265(10):5755-60.
- 512 31. McIntosh JC, Swyers AH, Fisher JH, Wright JR. Surfactant proteins A and D increase in response  
513 to intratracheal lipopolysaccharide. *American journal of respiratory cell and molecular biology*.  
514 1996;15(4):509-19.
- 515 32. Ferguson JS, Voelker DR, McCormack FX, Schlesinger LS. Surfactant protein D binds to  
516 *Mycobacterium tuberculosis* bacilli and lipoarabinomannan via carbohydrate-lectin interactions  
517 resulting in reduced phagocytosis of the bacteria by macrophages. *J Immunol*. 1999;163(1):312-21.

- 518 33. Hartshorn K, Chang D, Rust K, White M, Heuser J, Crouch E. Interactions of recombinant human  
519 pulmonary surfactant protein D and SP-D multimers with influenza A. *The American journal of*  
520 *physiology*. 1996;271(5 Pt 1):L753-62.
- 521 34. Wu H, Kuzmenko A, Wan S, Schaffer L, Weiss A, Fisher JH, et al. Surfactant proteins A and D inhibit  
522 the growth of Gram-negative bacteria by increasing membrane permeability. *The Journal of clinical*  
523 *investigation*. 2003;111(10):1589-602.
- 524 35. Ligtenberg TJ, Bikker FJ, Groenink J, Tornoe I, Leth-Larsen R, Veerman EC, et al. Human salivary  
525 agglutinin binds to lung surfactant protein-D and is identical with scavenger receptor protein gp-340.  
526 *The Biochemical journal*. 2001;359(Pt 1):243-8.
- 527 36. Hartshorn KL, White MR, Shepherd V, Reid K, Jensenius JC, Crouch EC. Mechanisms of anti-  
528 influenza activity of surfactant proteins A and D: comparison with serum collectins. *The American journal*  
529 *of physiology*. 1997;273(6 Pt 1):L1156-66.
- 530 37. Hartshorn KL, White MR, Teclé T, Holmskov U, Crouch EC. Innate defense against influenza A  
531 virus: activity of human neutrophil defensins and interactions of defensins with surfactant protein D.  
532 *Journal of immunology*. 2006;176(11):6962-72.
- 533 38. Nadesalingam J, Bernal AL, Dodds AW, Willis AC, Mahoney DJ, Day AJ, et al. Identification and  
534 characterization of a novel interaction between pulmonary surfactant protein D and decorin. *The Journal*  
535 *of biological chemistry*. 2003;278(28):25678-87.
- 536 39. Vandivier RW, Ogden CA, Fadok VA, Hoffmann PR, Brown KK, Botto M, et al. Role of surfactant  
537 proteins A, D, and C1q in the clearance of apoptotic cells in vivo and in vitro: calreticulin and CD91 as a  
538 common collectin receptor complex. *Journal of immunology*. 2002;169(7):3978-86.
- 539 40. Yamazoe M, Nishitani C, Takahashi M, Katoh T, Ariki S, Shimizu T, et al. Pulmonary surfactant  
540 protein D inhibits lipopolysaccharide (LPS)-induced inflammatory cell responses by altering LPS binding  
541 to its receptors. *J Biol Chem*. 2008;283(51):35878-88.
- 542 41. Remer KA, Brcic M, Jungi TW. Toll-like receptor-4 is involved in eliciting an LPS-induced oxidative  
543 burst in neutrophils. *Immunology letters*. 2003;85(1):75-80.
- 544 42. Nadesalingam J, Reid KB, Palaniyar N. Collectin surfactant protein D binds antibodies and  
545 interlinks innate and adaptive immune systems. *FEBS Lett*. 2005;579(20):4449-53.
- 546 43. Gyllensten LJ, Hellstrom BE. Experimental approach to the pathogenesis of retrolental fibroplasia.  
547 II. The influence of the developmental maturity on oxygen-induced changes in the mouse eye. *American*  
548 *journal of ophthalmology*. 1955;39(4 Pt 1):475-88.
- 549 44. Sorensen GL, Dahl M, Tan Q, Bendixen C, Holmskov U, Husby S. Surfactant protein-D-encoding  
550 gene variant polymorphisms are linked to respiratory outcome in premature infants. *J Pediatr*.  
551 2014;165(4):683-9.
- 552 45. Crouch E, Chang D, Rust K, Persson A, Heuser J. Recombinant pulmonary surfactant protein D.  
553 Post-translational modification and molecular assembly. *The Journal of biological chemistry*.  
554 1994;269(22):15808-13.
- 555 46. Perkins DN, Pappin DJ, Creasy DM, Cottrell JS. Probability-based protein identification by  
556 searching sequence databases using mass spectrometry data. *Electrophoresis*. 1999;20(18):3551-67.
- 557 47. Grosche A, Hauser A, Lepper MF, Mayo R, von Toerne C, Merl-Pham J, et al. The Proteome of  
558 Native Adult Muller Glial Cells From Murine Retina. *Molecular & cellular proteomics : MCP*.  
559 2016;15(2):462-80.
- 560 48. Smith LE. Pathogenesis of retinopathy of prematurity. *Semin Neonatol*. 2003;8(6):469-73.
- 561

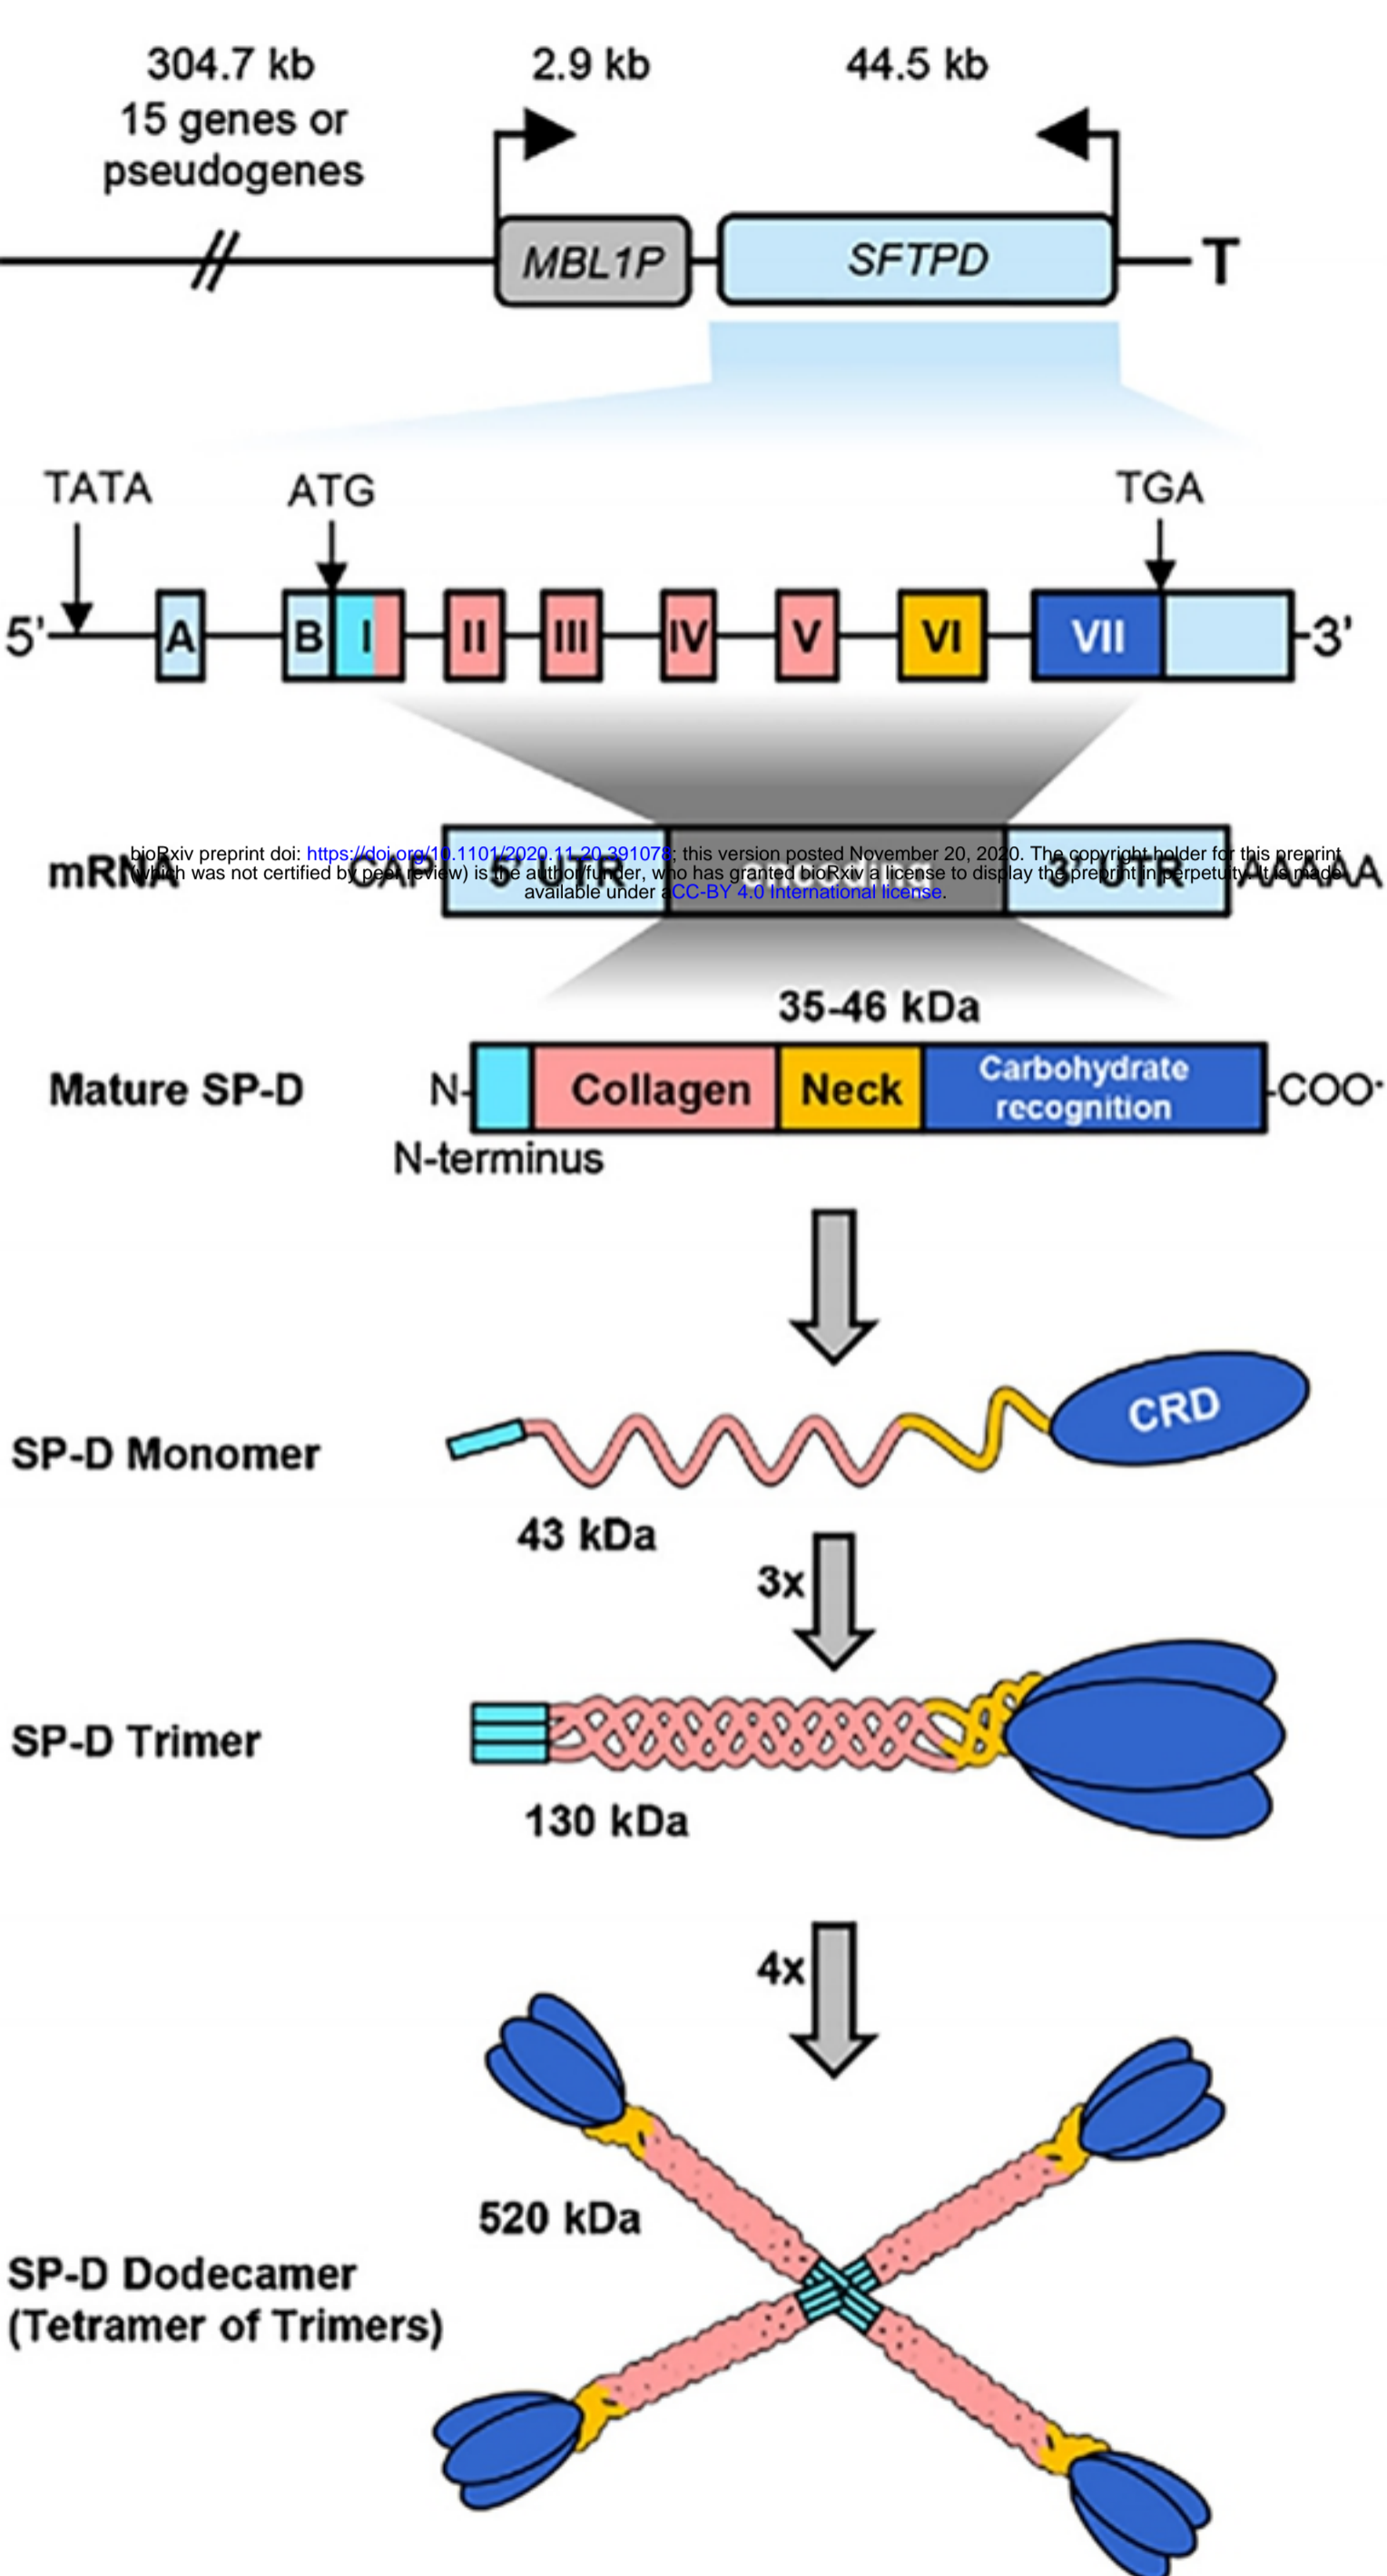

Figure 1. Schematic of gene map, transcription, and translational products and final protein structure of SP-D. The genes for SP-D are on chromosome 10. The mRNA is flanked by 5' untranslated regions (UTR) and 3' UTR containing a poly A tail. The UTRs are depicted in blue for Sftpd. There are two exons in the 5'UTR of SP-D (A, B). The four protein coding domains are named I–VII. The neck (VI) and collagen (I–VI) domains are shown in identical colors in the translated proteins. The carbohydrate recognitions domain (CRD, VII) and the cysteine-rich N-terminuses (I) are SP-D-specific. The final arrangement of protein chains is depicted with the classical cross of arms for SP-D. Modified from Vieira *et. al*, “Structure, genetics and function of the pulmonary associated surfactant proteins A and D: The extra-pulmonary role of these C type lectins”, *Ann Anat.* 2017

Figure



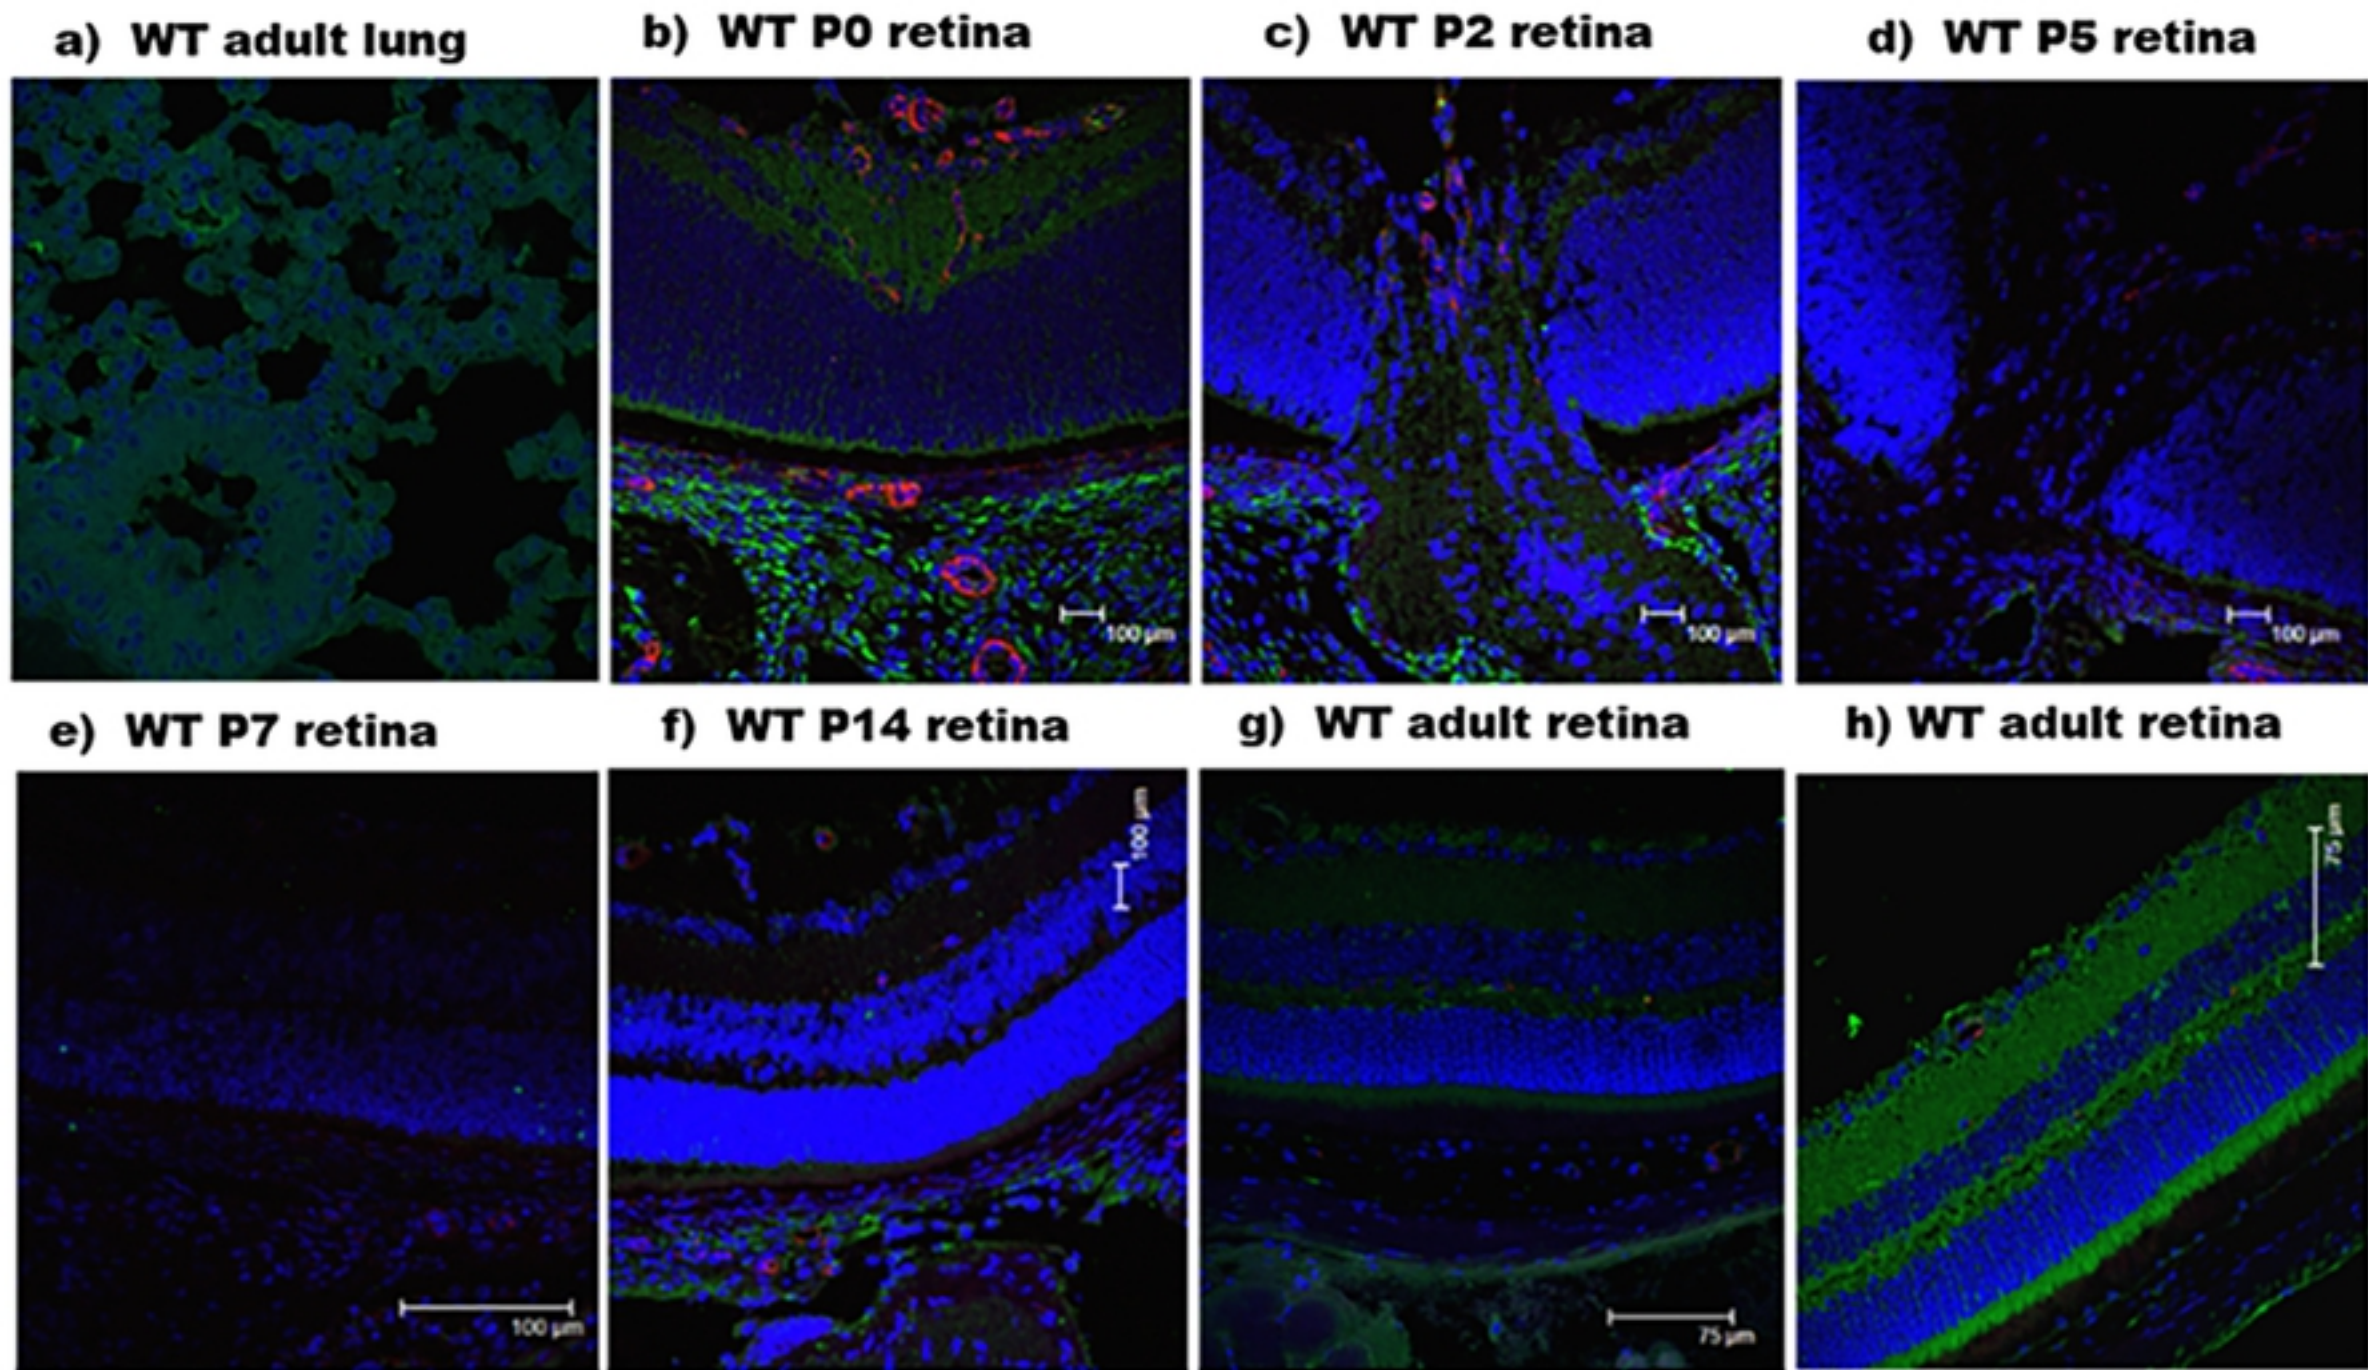

Figure 2. C57BL/6J wild-type (WT) mouse immunohistochemistry. Green color represents SP-D localization. Blue indicates cellular nuclei stained by DAPI. Red indicates vessel stained with anti-CD31. a) Adult lung tissue. b), c), d), e), f), g) show staining of the central retina at developmental stages from P0 to adult mouse. h) adult peripheral retina.

**a) R&D antibody**

**b) Antibodies-online**

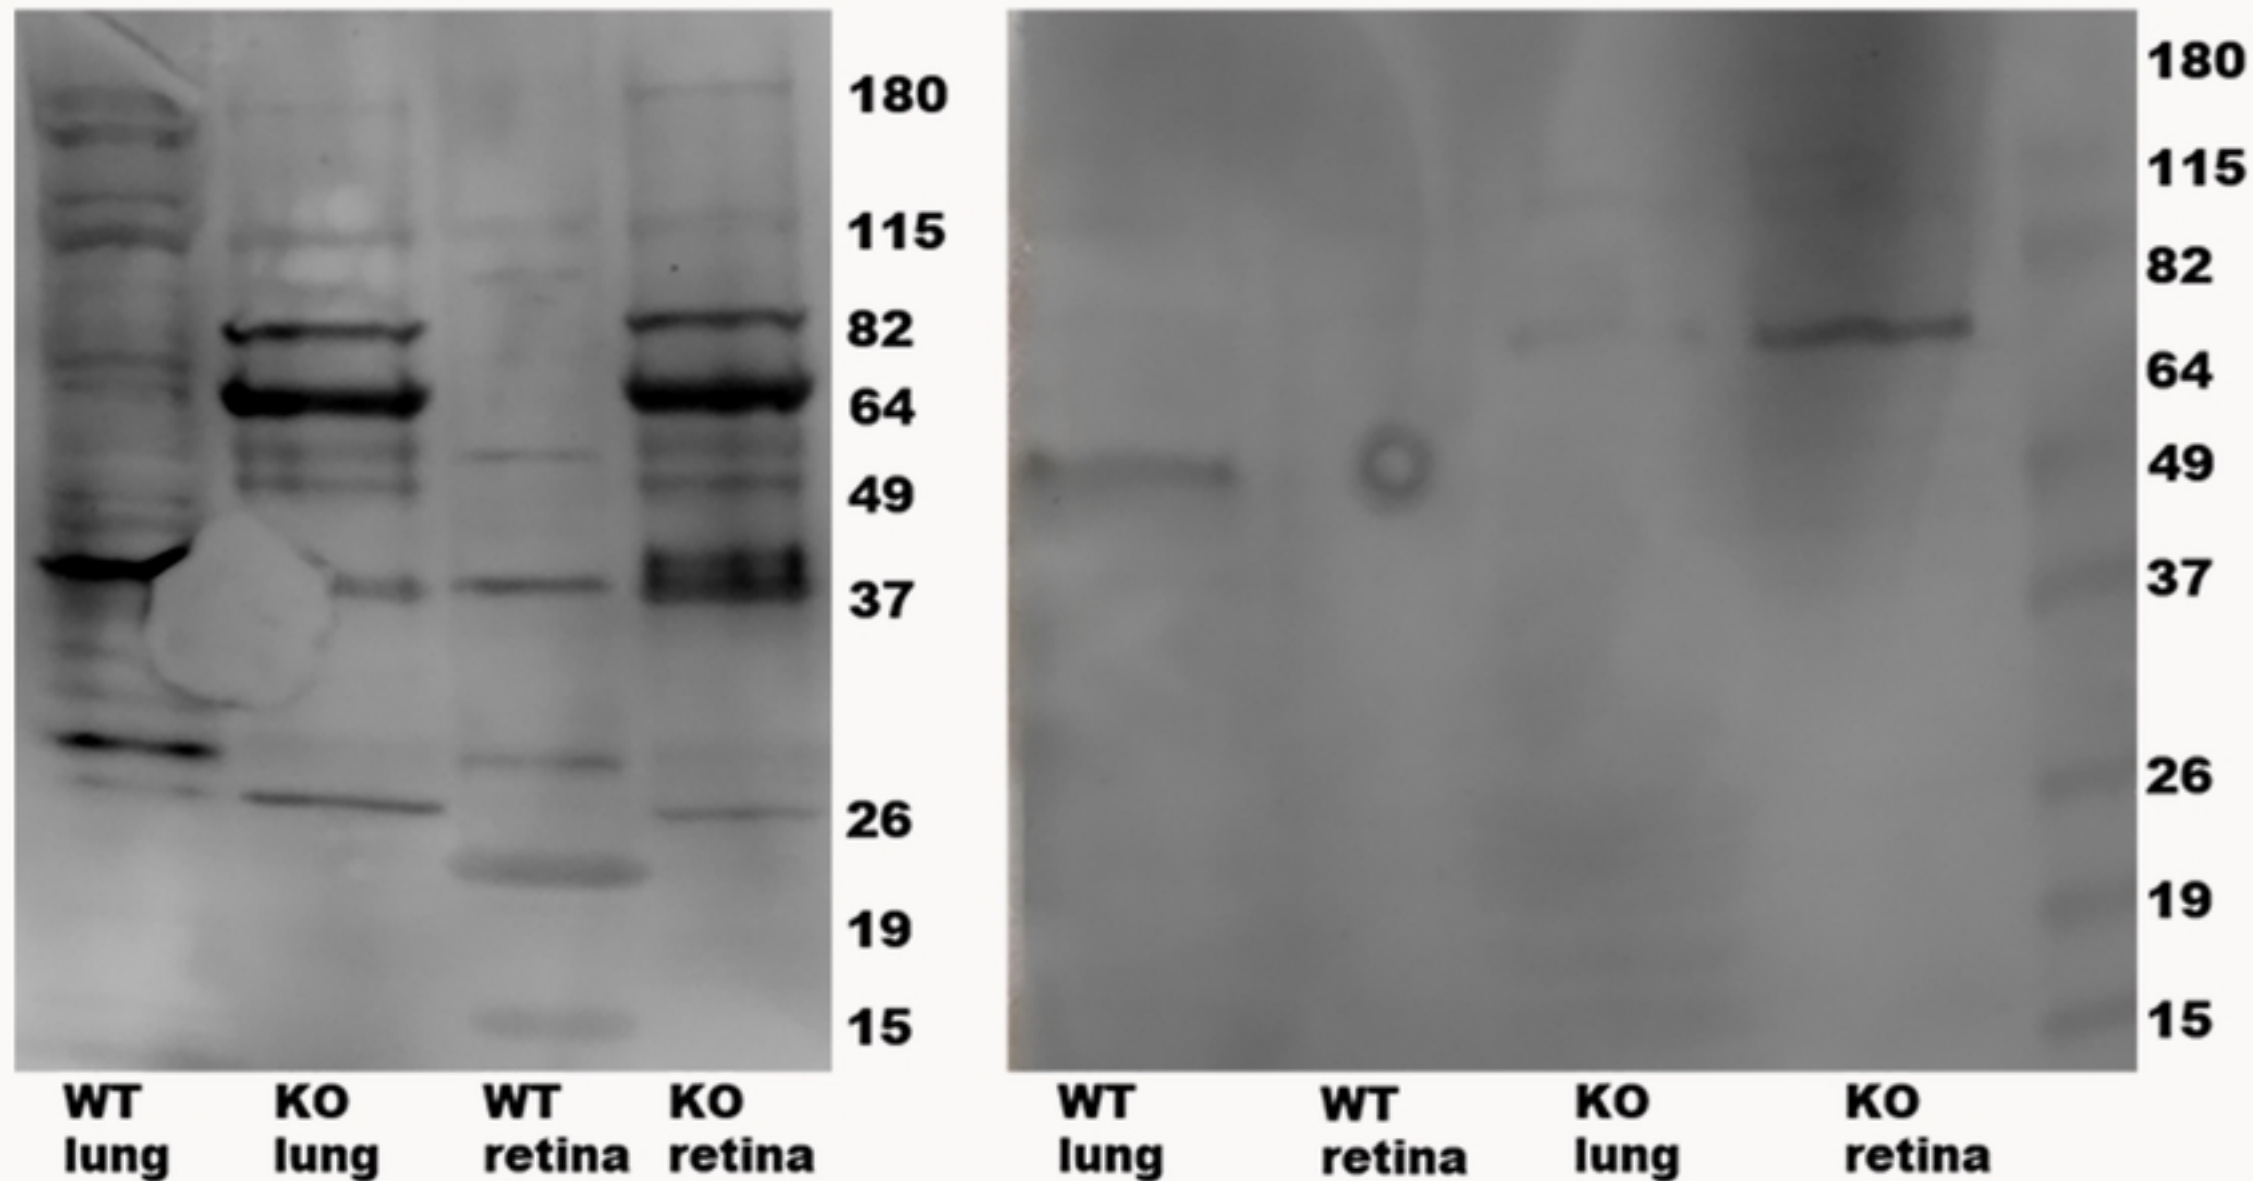

Figure 3. Western blot for SP-D in lung and retina for WT and SP-D<sup>-/-</sup> mouse.

Figure

**Triple-helical parallel coiled coil (neck)**

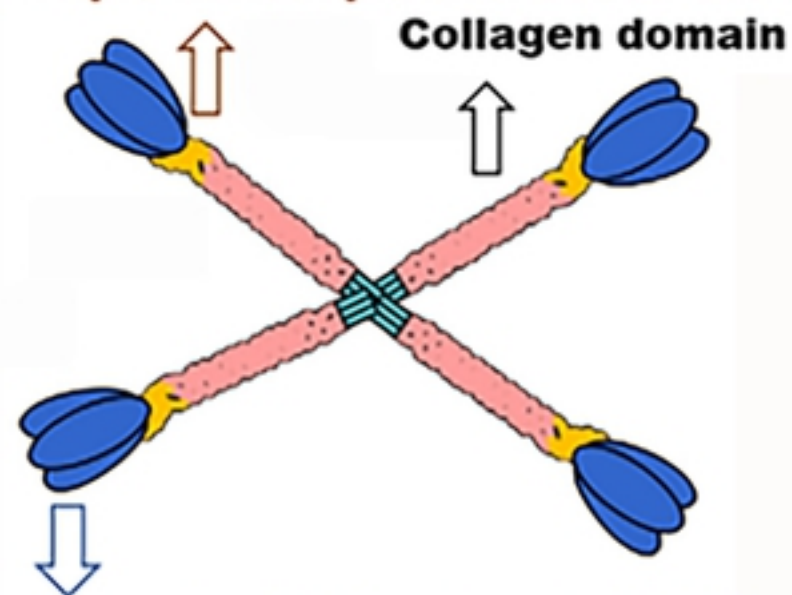

**Collagen domain**

**C-type lectin-like domain (CRD)**

MLPFLSMLVLLVQPLGNLGAEMKSLSQRSVPNTCTLVMCSPTENGLP  
GRDGRDREGPRGEKGDPLPGPMGLSGLQGPT  
GPVGPKGENGSA GEPGPKGERGLSGPPGLPGIPGPAGKE  
GPSGKQGNIGPQGGKPGPKGEAGPKGEV GAPGMQGST  
GAKGSTGPKGERGAPGVQGAPGNAGAAGPAGPAGPQGAPG  
SRGPPGLKGD RGVP GDRGIKGESGLPD **SAALRQQMEALKGK**  
**LQRLEVAFSHYQKAALFPDGRSVGDKIFRTADSEKP**  
FEDAQEMCKQAGGQLASPR SATENAAIQQLITAHN  
KAAFLSMTDVGTEGKFTYPTGEPLVYSNWAPGEPN  
NNGGAENCVEIFTNGQWNDKACGEQRLVICEF

Figure 4. Peptide sequence in mature SP-D. Bold black represents peptides from the collagen domain, most similar to other collectins. The neck domain (brown) and CRD (blue) have different nucleotide sequences from other collectins. Underscored amino-acids represent the peptides sequence present only in the WT lung, but not in the SP-D<sup>-/-</sup> lung and WT retina, according to mass spectrometry.

Figure

**WT Lung**

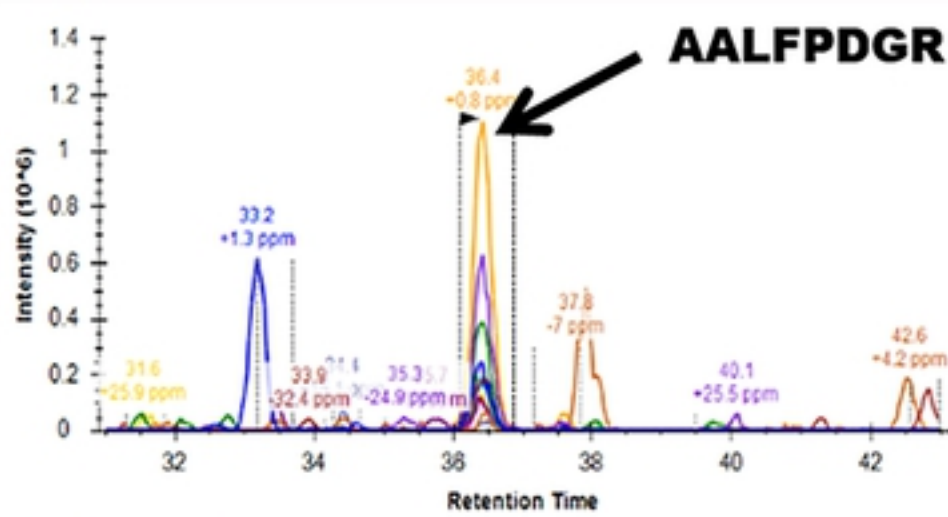

**LEVAFSHYQK, +3 ion**

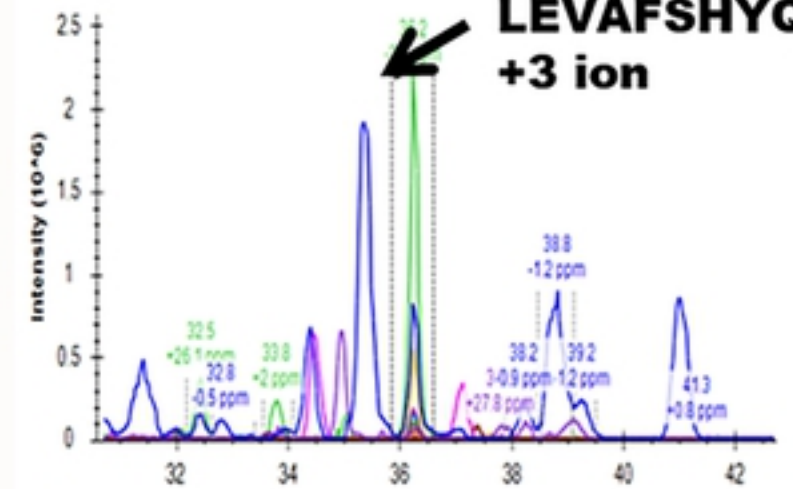

**SP-D<sup>-/-</sup> Lung**

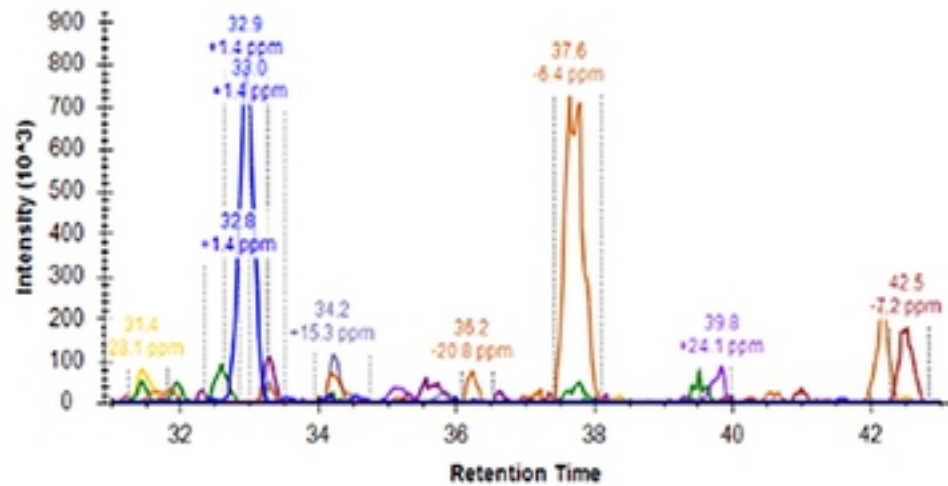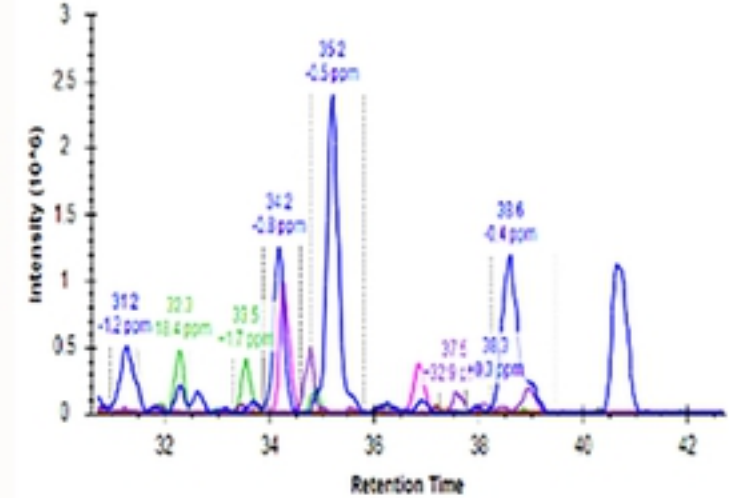

**WT Retina**

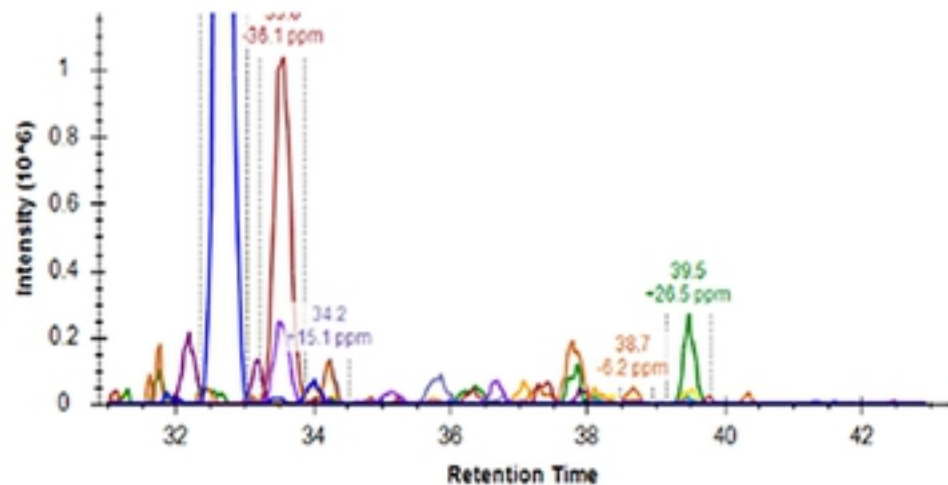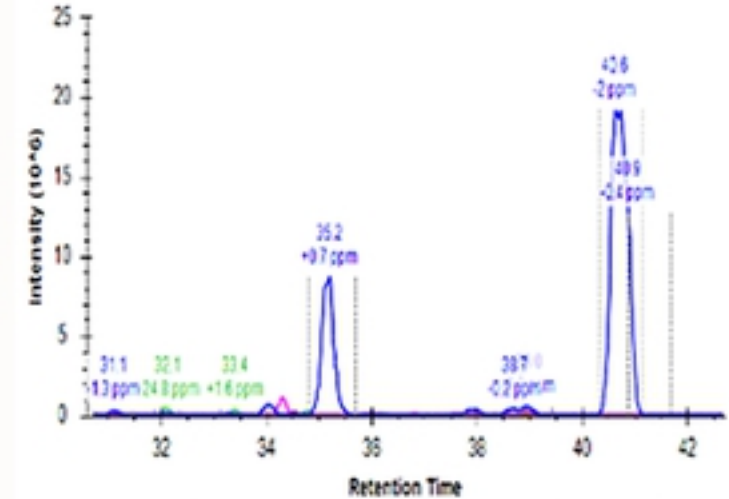

Figure 5. Mass spectrometry results. Two peptide sequence of mature SP-D, "AALFPDGR" and "LEVAFSHYQK", of the neck domain has a peptide peak in the WT lung, but not in the SP-D<sup>-/-</sup> lung or WT retina.

Figure

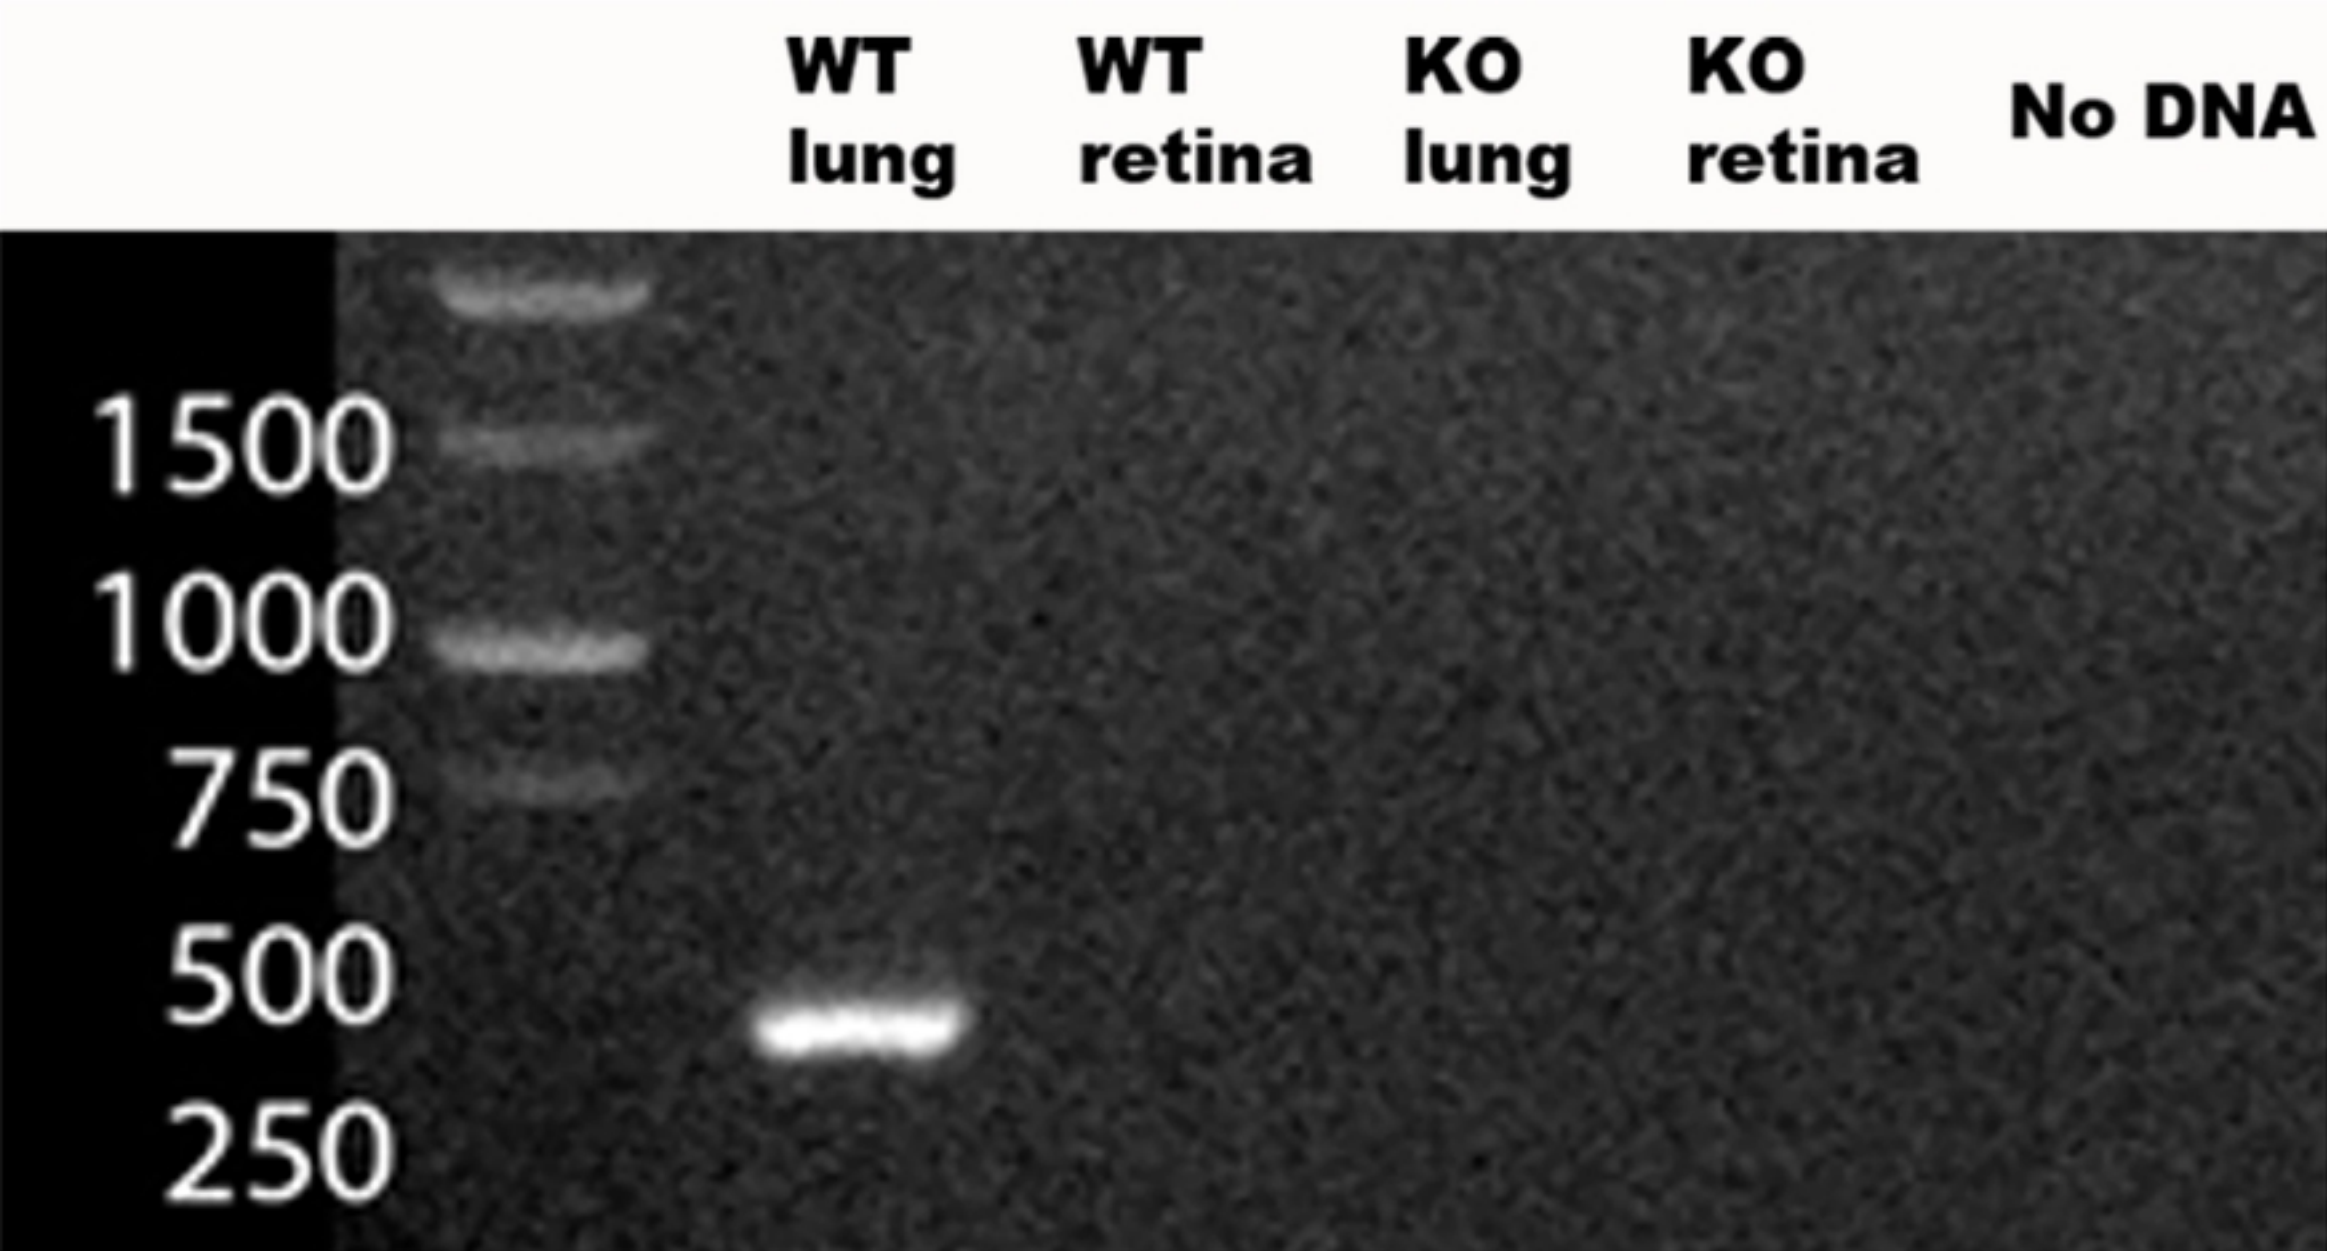

Figure 6. mRNA PCR for SP-D (430 Kb pair). Positive for WT lung (positive control), negative for SP-D<sup>-/-</sup> lung (negative control). WT retina and SP-D<sup>-/-</sup> retina were negative.

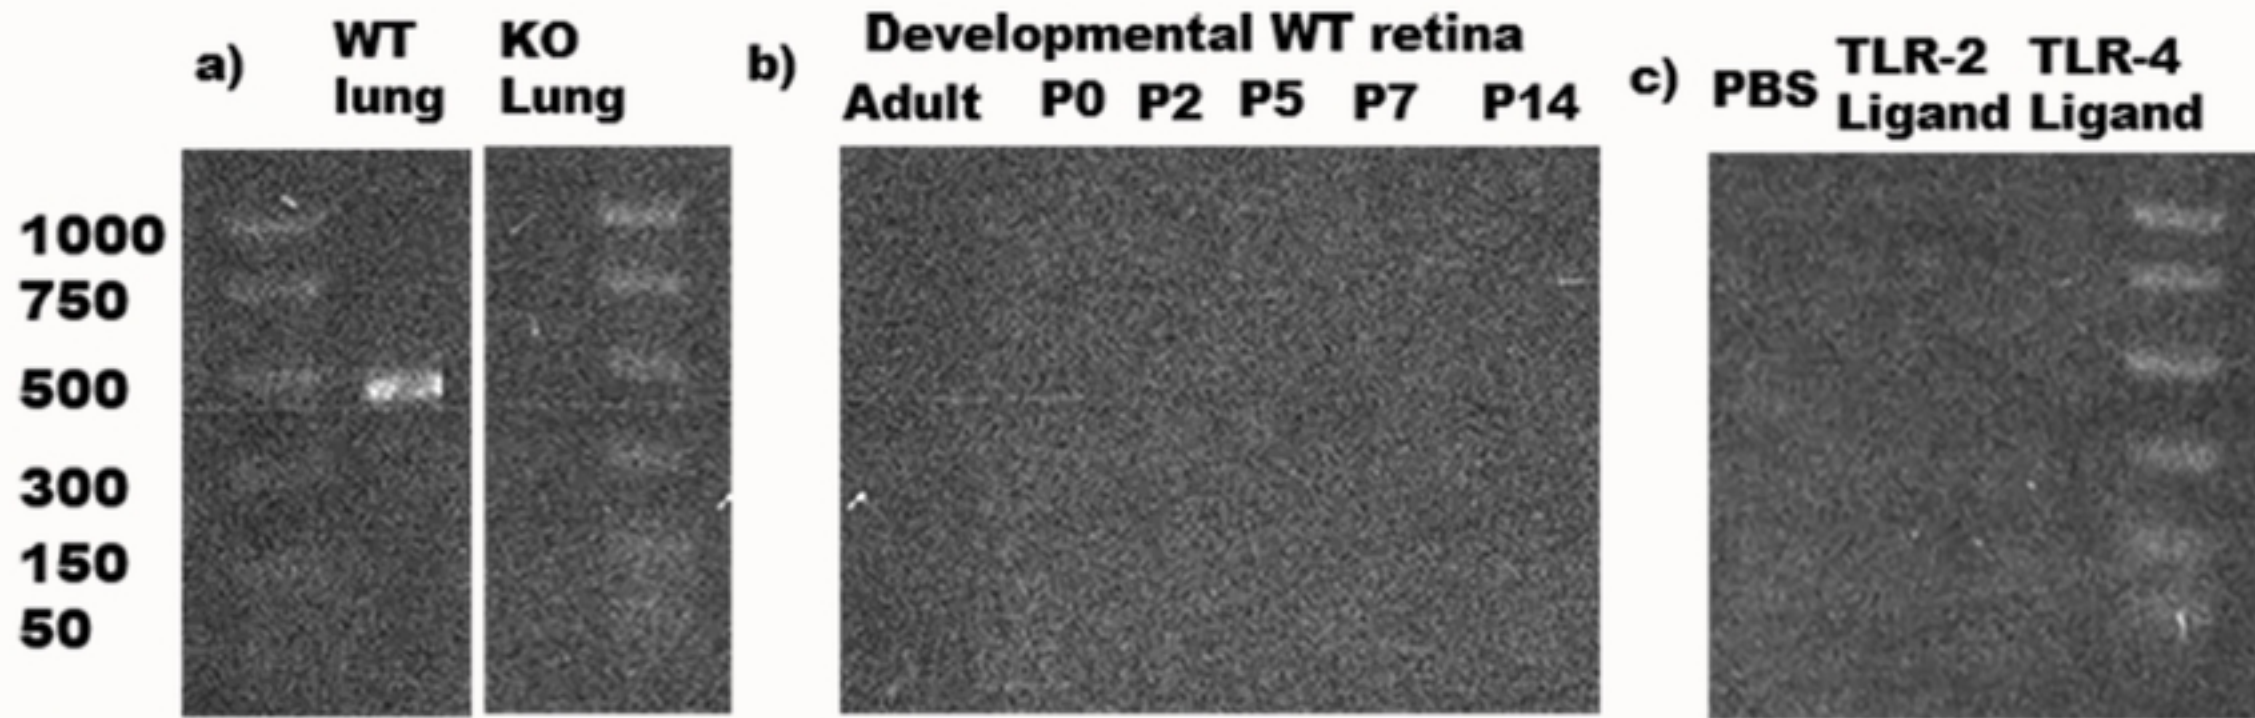

Figure 7. mRNA PCR for SP-D. a) WT lung and KO lung positive and negative controls; b) developmental retina from P0 to adult mouse; c) intravitreal injection of TLR-2, TLR-4 ligands, and PBS (negative control). SP-D mRNA at 430 kb.

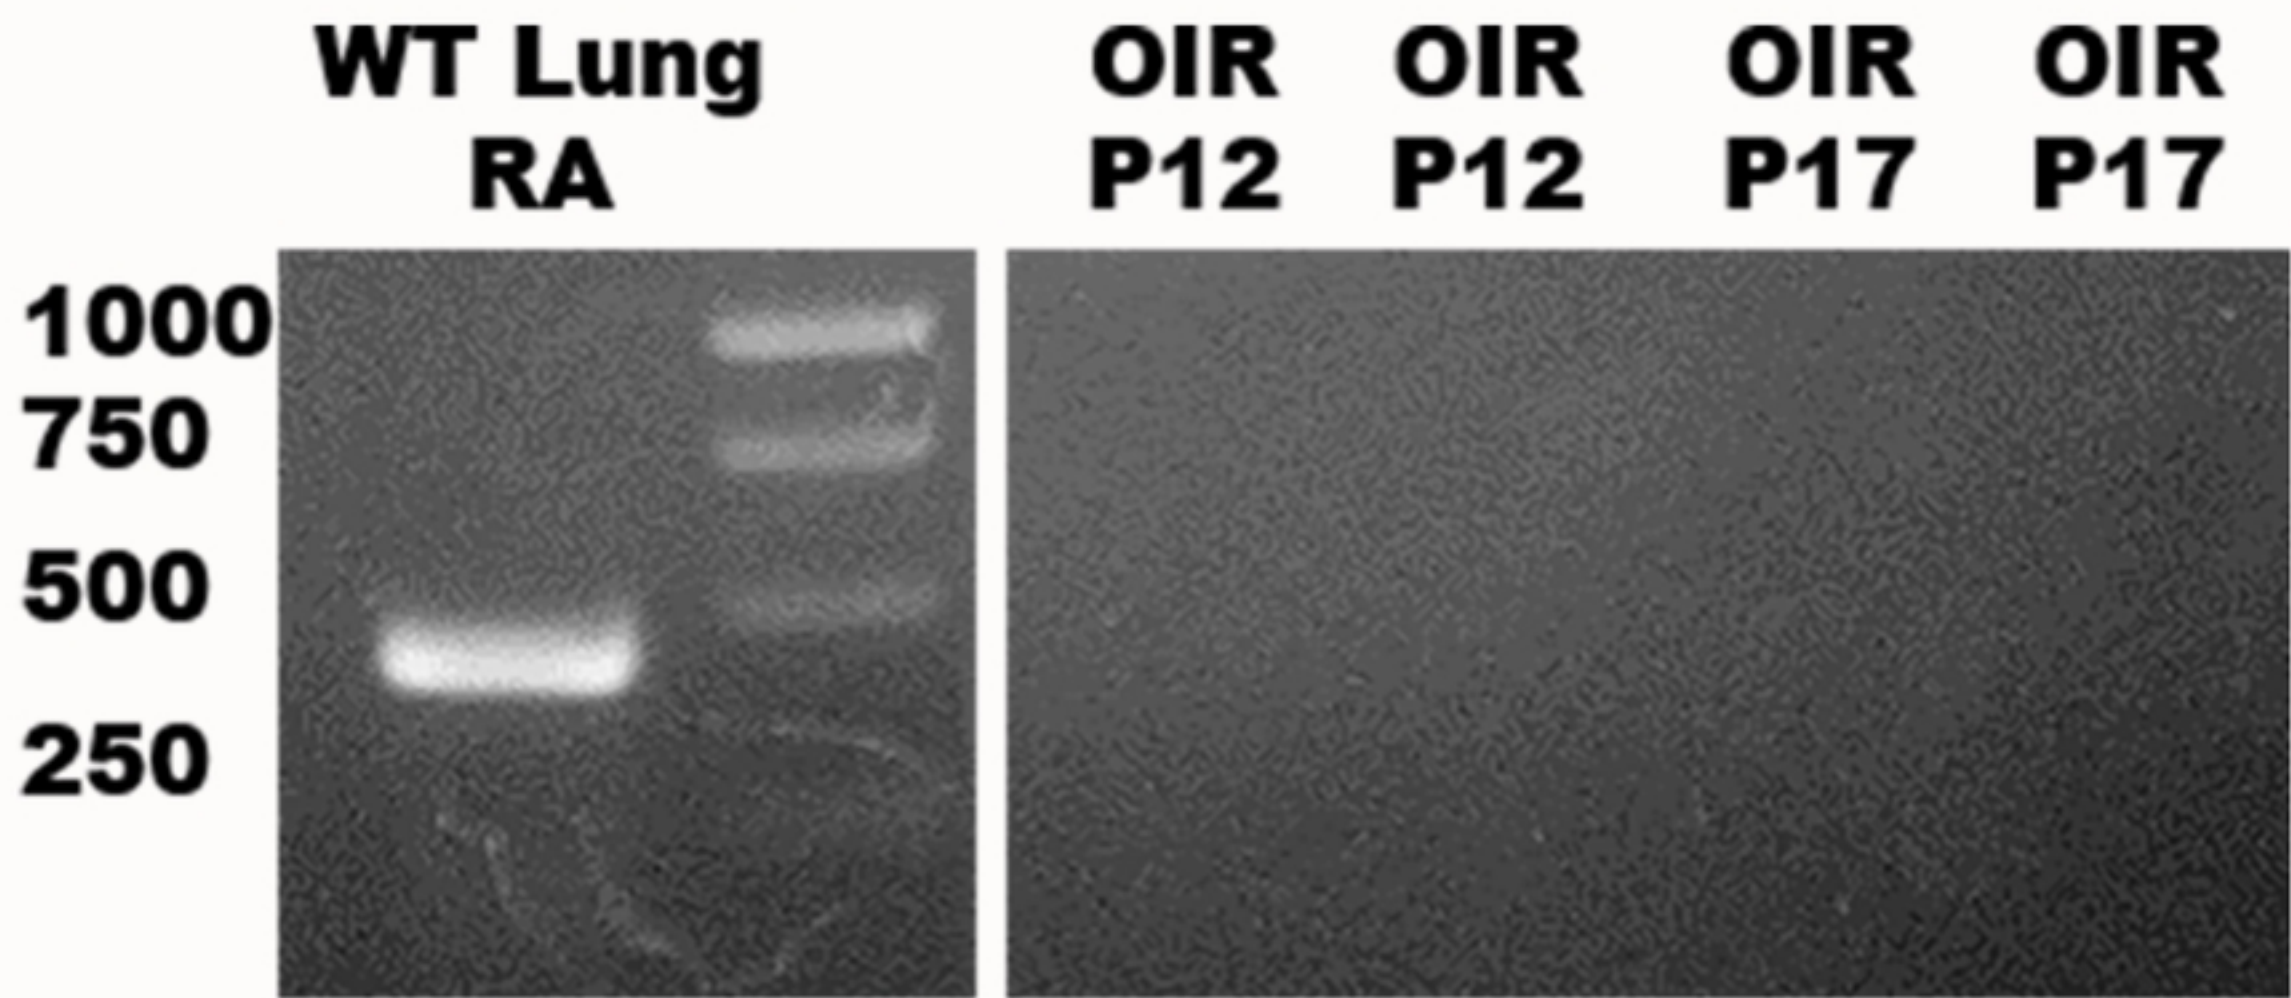

Figure 8. mRNA PCR. WT lung on RA (positive control) generated 430 kb. Two samples of OIR P12 and P17 were negative.

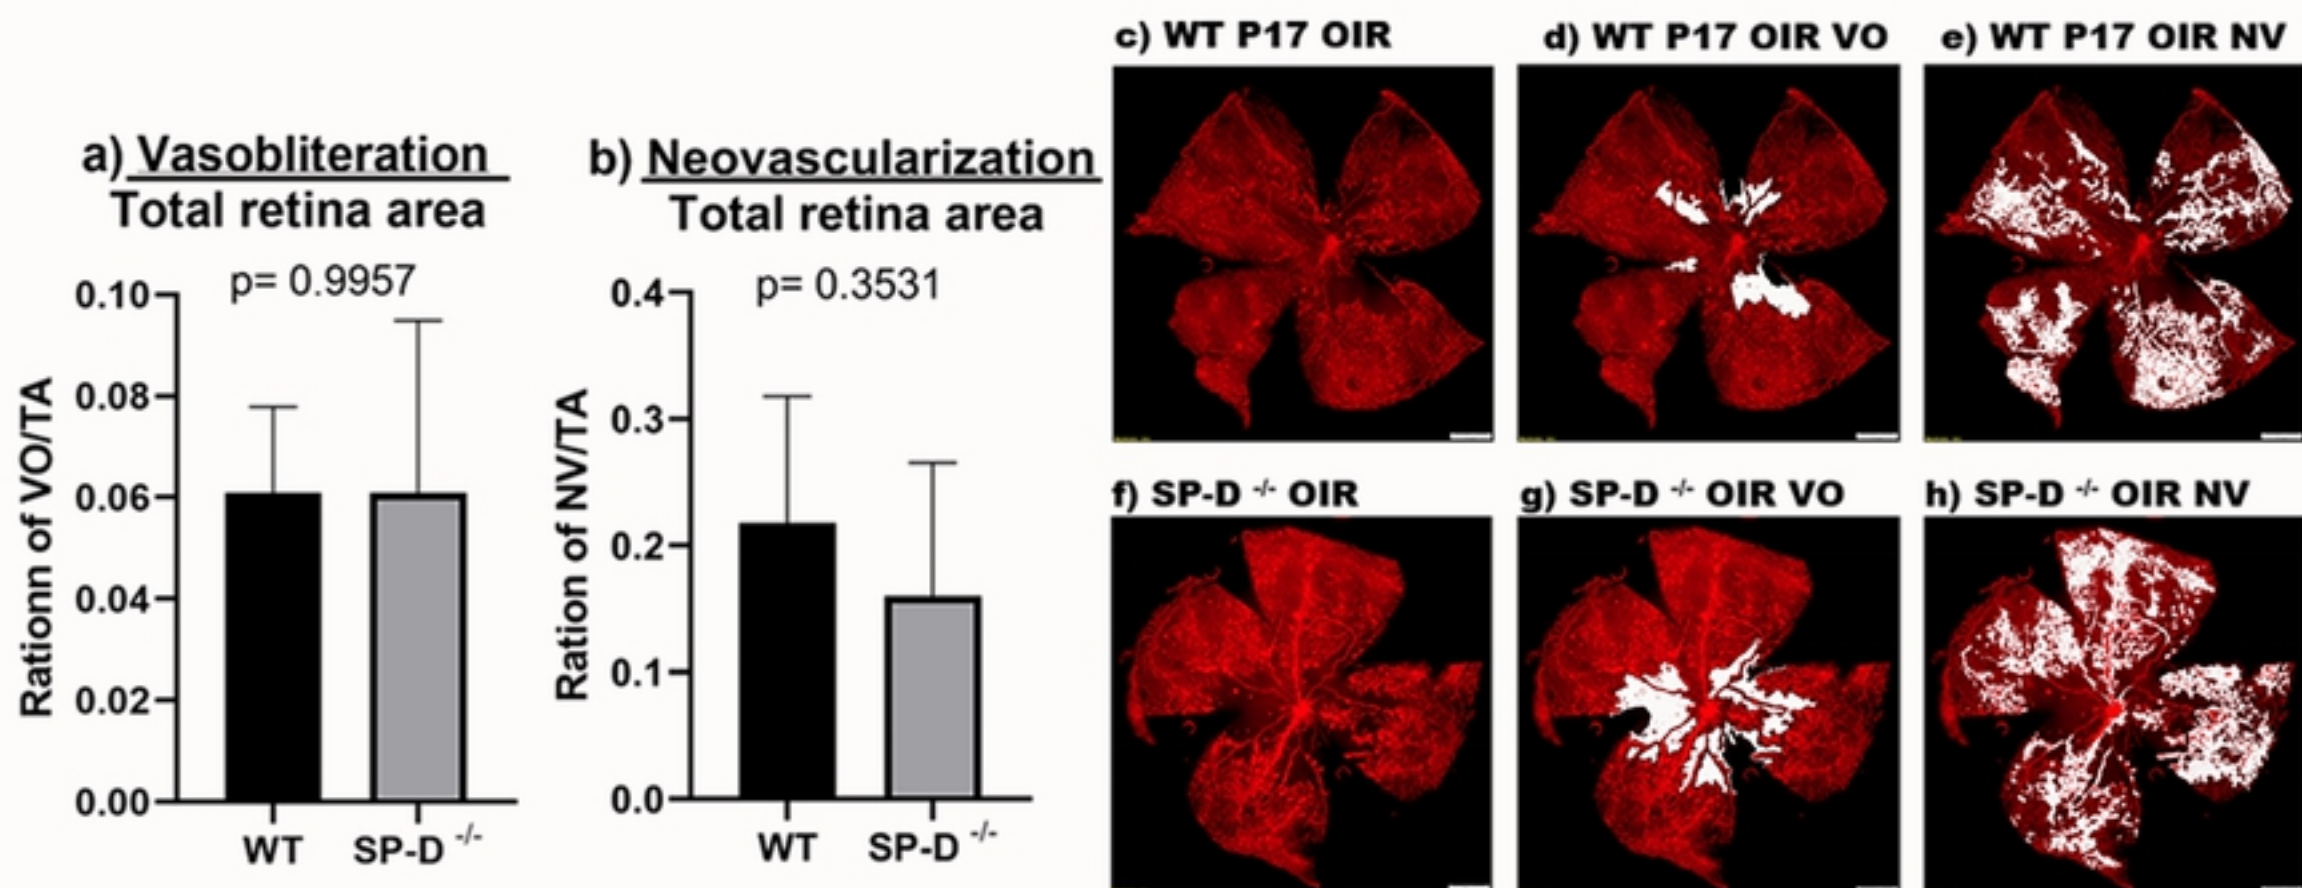

Figure 9. a) Vasobliteration and b) Neovascularization ration in WT and SP-D<sup>-/-</sup> C57 pups at P17 after oxygen-induced retinopathy (OIR); N=6 per group. (c, d, e) Example of retina flat mount of C57BL/6J wild-type animal after OIR. (f, g, h) Similar example of retina flat mount of SP-D<sup>-/-</sup> mouse. Vasobliteration (VO). Neovascularization (NV)
